# Crowdsourced study of children with autism and their typically developing siblings identifies differences in taxonomic and predicted function for stool-associated microbes using exact sequence variant analysis.

Maude M David<sup>1,2</sup>, Christine Tataru<sup>1</sup>, Jena Daniels<sup>1</sup>, Jessey Schwartz<sup>1</sup>, Jessica Keating<sup>1</sup>, Jarrad Hampton-Marcell<sup>3</sup>, Neil Gottel<sup>4</sup>, Jack A. Gilbert<sup>3,4</sup>, Dennis P. Wall<sup>1,5\*</sup>

<sup>1</sup> Department of Pediatrics, Division of Systems Medicine, Stanford University, Stanford, CA, USA

<sup>2</sup> Department of Microbiology, Oregon State University, Corvallis, OR, USA

<sup>3</sup> Bioscience Division, The Microbiome Center, Argonne National Laboratory, Argonne, Illinois, USA

<sup>4</sup> Department of Surgery, The Microbiome Center, University of Chicago, Chicago, Illinois, USA

<sup>5</sup> Department of Biomedical Data Science, Stanford University, Stanford, CA, USA

## \*Corresponding Author:

Dennis P. Wall, Ph.D.

Department of Pediatrics, Division of Systems Medicine

Stanford University

1265 Welch Rd, Suite X141, Stanford, CA 94305

P: 650-497-0921

E: [dpwall@stanford.edu](mailto:dpwall@stanford.edu)

## Keywords

Autism spectrum disorder, microbiome, crowdsourcing, 16S ribosomal sequencing, Clostridiales, Lachnospiraceae, butyrate

## 1 SHORT ABSTRACT

2 Autism Spectrum Disorder (ASD) affects 1 in 59 children in the United States and is impacted by both genetic and  
3 environmental factors, including the gut microbiome. To investigate the link between microbiome functionality and ASD,  
4 this study analyzes behavioral data (with home video and questionnaires) and 16S-amplicons crowd-sourced from age-  
5 matched sibling pairs (2-7 yo) where one sibling has an ASD diagnosis and the other does not. We identified 21 exact  
6 sequence variants (ESVs) that are significantly differentially abundant between the two cohorts. ESVs from the families  
7 Ruminococcaceae and Bacteroidaceae were found preferentially in the ASD cohort, while ESVs from the genera  
8 *Bifidobacterium*, *Porphyromonas*, *Slackia*, *Desulfovibrio*, species *Acinetobacter johnsonii*, and the *Lachnospiraceae*  
9 family, were specific to the neurotypical cohort. Predicting KEGG Orthologs from these ESVs, we found both cohorts  
0 harbor butyrogenic pathways, but the ESVs enriched in the ASD cohort can use 4-aminobutanoate as precursor,  
1 potentially impacting the availability of neurotransmitters.  
2

## 3 ABSTRACT

### 4 Background

5 The existence of a link between the gut microbiome and autism spectrum disorder (ASD) is well established in mice, but  
6 in human populations efforts to identify microbial biomarkers have been limited due to problems stratifying participants  
7 within the broad phenotype of ASD and a lack of appropriately matched controls. To overcome these limitations and  
8 investigate the relationship between ASD and the gut microbiome, we ran a crowdsourced study of families 2-7 year old  
9 sibling pairs, where one child of the pair had a diagnosis of ASD and the other child did not.

### 10 Methods

11 Parents of age-matched sibling pairs electronically consented and completed study procedures via a secure web portal  
12 (microbiome.stanford.edu). Parents collected stool samples from each child, responded to behavioral questionnaires about  
13 the ASD child's typical behavior, and whenever possible provided a home video of their ASD child's natural social  
14 behavior. We performed DNA extraction and 16S rRNA amplicon sequencing on 117 stool samples (60 ASD and 57 NT)  
15 that met all study design eligibility criteria, and filtered sequences that did not pass quality control tests. Using DADA2,  
16 Exact Sequence Variants (ESVs) were identified as taxonomic units, and three statistical tests were performed on ESV  
17 abundance counts: (1) permutation test to determine differences between sibling pairs, (2) differential abundance test  
18 using a zero-inflated gaussian mixture model to account for the sparse abundance matrix, and (3) differential abundance  
19 test after modeling under a negative binomial distribution. The potential functional gene abundance for each sample was  
20 also inferred from the 16S rRNA data, providing KEGG Ortholog (KO) proportions, which were analyzed for differential  
21 abundance using an enrichment algorithm.

### 22 Results

23 In total, 21 ESVs had significantly differentially proportions in stool of children with ASD and their neurotypical siblings.  
24 Of these 21 ESVs, 11 were enriched in neurotypical children and ten were enriched in children with ASD. ESVs enriched  
25 in the ASD cohort were predominantly associated with Ruminococcaceae and Bacteroidaceae; while those enriched in  
26 controls were more diverse including taxa associated with *Bifidobacterium*, *Porphyromonas*, *Slackia*, *Desulfovibrio*,  
27 *Acinetobacter johnsonii*, and Lachnospiraceae. Exact Variant Analysis suggested that Lachnospiraceae was specific to the

1 control cohort, while Ruminococcaceae, Tissierellaceae and Bacteroidaceae were significantly enriched in children with  
2 ASD. Metabolic gene predictions determined that while both cohorts harbor the butyrogenic pathway, the ASD cohort  
3 was more likely to use the 4-aminobutanoate (4Ab) pathway, while the control cohort was more likely to use the pyruvate  
4 pathway. The 4Ab pathway releases harmful by- products like ammonia and can shunt glutamate, affecting its availability  
5 as an excitatory neurotransmitter. Finally, we observed differences in the carbohydrate uptake capabilities of various  
6 ESVs identified between the two cohorts.

## 7 **Conclusions**

8 Using crowdsourcing methods, we successfully recruited a sufficient sample of sibling pairs close in age while limiting  
9 environmental confounding factors that can impact microbiotic composition of the gut. Our findings support previously  
0 identified taxa that link the gut microbiota to children with ASD and also identifies several novel ESVs specific to each  
1 cohort, including clades within the Clostridiales order. Predicted functional metabolic differences suggest a potential  
2 impact on microbial neurotransmitter production. In addition to furthering our understanding of the underlying  
3 mechanisms of the associations between gut microbiome compositions and ASD, we have potentially identified novel  
4 ASD biomarkers that may help with future therapeutic interventions.  
5

1

## 2 INTRODUCTION

3 Autism spectrum disorder (ASD) is a heterogeneous developmental disorder affecting social and behavioral functioning in  
4 1 out of 59 children in the United States (Baio et al., 2018). Recent studies have identified several environmental factors  
5 associated with ASD etiology and susceptibility, including prenatal infection (Hall et al., 2012), zinc deficiency (Lakshmi  
6 Priya and Geetha, 2011), maternal diabetes (Gardener et al., 2009), toxins and pesticides (Moore et al., 2000), and  
7 advanced parental age (Parner et al., 2012). Individuals with ASD have demonstrated a high prevalence of gastrointestinal  
8 (GI) and immunologic abnormalities pertaining to GI motility and intestinal permeability (Boukthir et al., 2010; de  
9 Magistris et al., 2010). Additionally, ASD-typified behavioral traits are more severe in children with both ASD and GI  
0 disturbances (Adams et al., 2011). These factors have also been shown to influence or be influenced by the intestinal  
1 microbiome (Spor et al., 2011), which could suggest a role for the intestinal microbiota in mediating ASD and ASD-  
2 typified behavioral traits.

3

4 The legitimacy of the proposed microbiome-ASD connection is supported by recent research on ASD phenotype mouse  
5 models and the microbiota compositions of human individuals with ASD (Finegold et al., 2002; Song et al., 2004;  
6 Desbonnet et al., 2008; Bercik et al., 2011; Bravo et al., 2011; Messaoudi et al., 2011; Hsiao et al., 2013; Kang et al.,  
7 2013). Hsiao *et al.* (2013) found that administrating *Bacteroides fragilis* to ASD mouse models improved ASD-typified  
8 behavioral traits by reducing anxiety, restoring communicative behaviors, and improving sensorimotor gating (Hsiao et  
9 al., 2013). Bacterial taxa, such as members of *Lactobacillus* and a genus of *Bifidobacterium*, have demonstrated  
10 microbially-induced behavioral modulation in both rats and humans (Desbonnet et al., 2008; Bercik et al., 2011; Bravo et  
11 al., 2011; Messaoudi et al., 2011; Kang et al., 2013). Moreover, several studies have identified microbial trends amongst  
12 the ASD population such as an increased abundance of *Clostridium* (Finegold et al., 2002; Song et al., 2004). More  
13 recently, a study involving Fecal Microbiome Transplant between neurotypical controls and children with ASD  
14 demonstrated a significant improvement in both GI and neurobehavioral symptoms following the treatment (Kang et al.,  
15 2017a). This study particularly demonstrates a potential causative relationship between the gut microbiome and ASD  
16 symptoms. While the data on the microbiome-ASD symptom link is compelling, studies attempting to identify the specific  
17 microbes responsible have maintained small sample sizes, single time point sampling, limited phenotype scoring and  
18 sampling, and a lack of bacterial phylogenetic resolution, factors that may impact the reproducibility of the results.

9

10 The present study aims to determine the specific intestinal microbiota that associate with behavioral traits in children with  
11 ASD. We recruited families with age-matched neurotypical and ASD siblings via crowdsourcing to reach a sufficient  
12 sample size. (Krippendorff, 2004; Behrend et al., 2011; Swan, 2012; Comber et al., 2013; Jeong et al., 2013; Hong et al.,  
13 2015; David et al., 2016). Recruited families had a child clinically diagnosed with ASD and a neurotypical sibling who  
14 were both between the ages of 2-7 and no more than 2 years apart in age. The crowdsourcing recruitment methodology  
15 enabled us to recruit a large cohort of families disbursed across the United States. Each family completed behavioral and  
16 dietary questionnaires online and collected a stool sample from each child at home via sampling kits shipped to each  
17 family by the research team. This approach facilitated the collection of diverse and pertinent metadata regarding allergies,  
18 diet, supplement usage, gastrointestinal abnormalities, gestational age, and antibiotic and probiotic treatment (Swan, 2012;

1 Jeong et al., 2013; Hong et al., 2015; Walters et al., 2015; David et al., 2016). We confirmed the self-reported autism  
2 diagnosis of each child by leveraging validated machine-learning classification tools that assess ASD-typified features  
3 obtained from parent reports and home video showcasing social interactions (Wall et al., 2012; Duda et al., 2014; Fusaro  
4 et al., 2014; Kosmicki et al., 2015; Duda et al., 2016; Levy et al., 2017).

## 5 **MATERIALS AND METHODS**

### 6 **Crowdsourcing Recruitment and Data Collection**

7 Data were collected from March 2015 to September 2017 under an approved Stanford University Institutional Review  
8 Board protocol (eProtocol 30205). To target and inform the autism community of the study, we crowdsourced study  
9 subject recruitment via popular social media networking platforms including Twitter, Facebook, autism-focused Yahoo  
0 Groups, and a press released article from National Public Radio. In addition, we engaged with non-profit and for-profit  
1 companies who informed their community of the study via their social media platforms and email lists.

2 Parents of eligible participants completed the online component of study procedures via a secure, HIPAA-compliant web-  
3 based platform (<https://microbiome.stanford.edu>) where they provided electronic consent, responded to behavioral,  
4 demographic, and dietary surveys on behalf of their children, and uploaded a home video of the child with autism.  
5 Metadata were collected using RedCap (Harris et al., 2009; Lowe et al., 2009).

### 7 **Sampling Kits**

8 After they completed the online surveys, research staff mailed sampling kits to families for at-home stool collection. Each  
9 sampling kit included two sets of collections tubes and swabs to collect stool samples, for both the child with ASD and his  
10 or her neurotypically developing sibling, from soiled toilet paper, instructions on how to collect the samples, and a  
11 detailed, 53-question dietary questionnaire for each child (see Supporting Information SI 1). Participants returned the  
12 samples to the research staff via prepaid and pre-labelled packaging (McDonald et al., 2018).

### 14 **ASD Diagnosis Confirmation**

15 To confirm the parent-provided ASD diagnosis of a child-subject, we applied two machine learning classifiers, one based  
16 on a parent-directed questionnaire (Duda et al., 2016)Wall:2012gv} and one based on a home video of the child with ASD  
17 (Wall et al., 2012; Duda et al., 2014; Levy et al., 2017). The parent-directed questionnaire is described below as “Mobile  
18 Autism Risk Assessment or MARA” and the video-based classifier is referred to as “video classifier. Due to both privacy  
19 and technical barriers to video upload, we made the video upload optional but required that all subjects complete the  
20 MARA as a strict inclusion criterion. We confirmed the self-reported diagnosis of the child using MARA and, when  
21 available, both the MARA and the video classifier. When both were available, concordance in outcome from both  
22 classifiers with the self-reported diagnosis was required for a sample to be included in our study.

### 14 **Mobile Autism Risk Assessment**

15 Participants electronically completed the clinically validated Mobile Autism Risk Assessment (MARA) (Duda et al.,  
16 2016)Wall:2012gv}. This system uses a set of 7 behavioral features developed through machine learning for rapid  
17 screening for autism. The 7-feature set is measured through parent-report in a questionnaire on a mobile device. Each

1 feature is scored by the parent on a scale from 0 to 4, 0 being most impaired and 4 being least impaired. The features  
2 focus on the child's language ability, make-believe play, social activity, restricted and repetitive behaviors, general signs  
3 of developmental delays by or before age 3, and eye contact. The responses generate a score that classifies the child as  
4 either "ASD" (positive score) or "no ASD" (negative score).

### 6 ***Video Analysis***

7 In addition, we requested (as optional) a home video of their child with ASD via our secure study website. For a video to  
8 be eligible for analysis, we asked that it include social interaction, use or play with objects in the video, be at least two  
9 minutes long, and clearly show the child's face and hands. The specific details of scoring and the validation of the  
0 classifier are described in previous publications (Wall et al., 2012; Duda et al., 2014; Levy et al., 2017). For the purposes  
1 of this study we had 3 video raters who were blind to diagnosis independently tag the specific behavioral features that our  
2 video classifier requires to produce a risk score. We took the majority consensus diagnosis as the outcome for comparison  
3 with the caregiver's self-reported diagnosis.

4 To safeguard against ascertainment bias due to increasing familiarity, we required our video analysts to score an unlabeled  
5 mixture of ASD participant videos and similar home videos of neurotypical children ages 2-7 years mined from  
6 YouTube's publicly available video repository. The responses to each question were scored on a scale from 0 to 4,  
7 generating a classification of the child as either "ASD" or "no ASD". Similar to the MARA, the outcome is a probability  
8 score that indicates both class (ASD or non-ASD) as well as severity of phenotype.

### 10 **Lifestyle and Dietary Practices**

11 Participants electronically completed dietary and lifestyle questionnaires on behalf of their children, using a 5-point  
12 frequency-based Likert scale and categorical answers (Supplementary Information SI 1). Questions covered dietary habits  
13 (e.g., How many servings of vegetables does your child eat in a typical week?), lifestyle habits (e.g., How many times a  
14 week does your child exercise?), and other pertinent information (e.g., Was your child born by C-section?).

15 We investigated systematic differences in the dietary habits of lifestyles of children with ASD as compared to NT  
16 children. Categorical data items were assigned either 1 or 0, and Likert scale items were assigned a value from 1 to 5 (1 =  
17 "Never," 2 = "Occasionally," 3 = "Sometimes," 4 = "Often," and 5 = "Always"). Differences of qualities with ordinal  
18 values were investigated using a linear-by-linear association test, and qualities with categorical values were tested using a  
19 chi-squared test. To verify that family relation was a practical criterion to ensure similarity between case and control  
20 lifestyle and dietary habits, we performed a permutation test (999 permutations) on the Euclidean distances between  
21 participants' numerical questionnaire responses. Data were standardized to mean as 0 and variance as 1 to account for the  
22 differences in scale between categorical and Likert scale numerical values.

### 24 **DNA Extraction, Amplification and Sequencing**

25 Microbiome samples were processed according to the procedures outlined by the American Gut Project Protocol  
26 Apprill:2015gb, (Caporaso et al., 2011; 2012; Parada et al., 2015). DNA was extracted using the 96-well Powersoil DNA  
27 Isolation Kit (MO BIO, Carlsbad, CA). We utilized the manufacturer's protocol with the following modification: after the  
28 addition of the sample and solution C1, we partially submerged the sealed extraction plates in a water bath for 10 minutes

1 at 65°C. We amplified the extracted DNA using the 5PRIME MasterMix (5 PRIME, Inc, Gaithersburg, MD) and the  
2 515F/806R primers for a final concentration of 0.2µM per primer. Thermocycler settings for generating amplicons were 3  
3 minutes at 94°C, then 35 cycles at 94°C for 45 seconds, 50°C for 1 minute, and 72°C for 1.5 minutes, with a final  
4 extension for 10 minutes at 72°C. After PCR, we quantified the DNA concentration of each sample using the Quant-iT  
5 PicoGreen dsDNA Assay kit and then pooled to 70 ng DNA per sample. We generated clean pools using the QIAquick  
6 PCR Purification Kit (QIAGEN, Hilden, Germany). The clean pools were then submitted to the Environmental Sample  
7 Preparation and Sequencing Facility at Argonne National Laboratory to be sequenced on an Illumina MiSeq using V4  
8 chemistry.

## 0 **Sequence Filtering, Chimera Removal, Taxonomic Assignment and Phylogenetic Tree**

1 Raw sequences were processed using the workflow available in the software package DADA2 (Callahan et al., 2016),  
2 which models and corrects amplicon errors. Reads were trimmed to include base pairs 10 through 140 and truncated at the  
3 first instance of a Phred quality score less than 20. Reads with more than two expected errors were filtered out. Reads  
4 were then de-replicated and de-noised. Forward and reverse reads were merged and chimeras were removed. Taxonomy  
5 was assigned to each Exact Sequence Variant (ESV) generated by this pipeline by running the Ribosomal Database  
6 Project's (RDP) naive Bayesian classifier (Wang et al., 2007), implemented in DADA2, against the GreenGenes dataset  
7 maintained in DADA2 package (DeSantis et al., 2006).

8 The phylogenetic tree was rooted using an archea sequence from *Halorhabdus rudnickae* as an outgroup (see available  
9 github code): all the sequences were aligned using the phangorn package and a Neighbor-Joining Tree was built (SAITOU  
10 and NEI, 1987) using ape. The tree was bootstrapped 100 times with phangorn (Schliep, 2011).

## 11 **Statistical Analyses**

12 We performed statistical analyses with R version 3.4.2 (2017-09-28) using R Studio Integrated development environment  
13 for R v1.0.136 (open source software, Boston, MA). We used the following packages in R: DESeq2\_1.18.0,  
14 SummarizedExperiment\_1.8.0, DelayedArray\_0.4.1, matrixStats\_0.52.2, GenomicRanges\_1.30.0, GenomeInfoDb\_1.14.0,  
15 IRanges\_2.12.0, S4Vectors\_0.16.0, BiocInstaller\_1.28.0, gtable\_0.2.0, cowplot\_0.8.0, lattice\_0.20-35, gridExtra\_2.3,  
16 scales\_0.5.0, metagenomeSeq\_1.20.0, RColorBrewer\_1.1-2, glmnet\_2.0-13, foreach\_1.4.3, Matrix\_1.2-11, limma\_3.34.0,  
17 Biobase\_2.38.0, BiocGenerics\_0.24.0, gage\_2.28.0, readr\_1.1.1, igraph\_1.1.2, ggplot2\_2.2.1, reshape2\_1.4.2,  
18 structSSI\_1.1.1, dplyr\_0.7.4, ape\_5.0, phyloseq\_1.22.3. All code used for this work is publicly available:  
19 [https://github.com/walllab/ASD\\_microbiome16s\\_public/](https://github.com/walllab/ASD_microbiome16s_public/). The raw fastq files can be found at (Kang et al., 2013; 2017b) .  
20 For a workflow diagram, see SI 9.

## 21 **Analysis of Alpha-Diversity Differences**

22 We calculated alpha-diversity for each sample using Shannon-Weiner diversity, a traditional metric that takes into account  
23 richness and evenness of taxonomic species, and Phylogenetic Diversity, a metric that measures the total length of  
24 phylogenetic branches necessary to span the set of taxa in a sample (Vuong and Hsiao, 2017). We then used a Wilcoxon  
25 rank sum test (Finegold, 2011) to quantify the significance of differences observed between the two cohorts. Next, we  
26  
27

1 performed 1000 bootstrap simulations to calculate the variance of diversity metrics observed in each cohort and again  
2 used a rank sum test to quantify significance of the difference in variances.

#### 4 **Identification of Dietary and Lifestyle Habits Influencing the Microbial Community**

5 To determine whether or not the parent-reported dietary and lifestyle questionnaires contained influential data and insight  
6 into the microbial communities observed in our samples, we used a PERMANOVA test (ADONIS function in vegan  
7 package) on Bray-Curtis distances between microbial compositions (Kang et al., 2013). For each dietary or lifestyle  
8 factor, samples are broken into K clusters where K is the number of possible responses to the question. The distance  
9 between sample microbial compositions was calculated, and the within-cluster distances compared to the between-cluster  
0 distances over random permutations of cluster membership. We also performed a test to measure the homogeneity of the  
1 dispersion (PERMDISP2 procedure) of each cluster in order to be more confident that the cluster-specific centroids were  
2 robustly different rather than due to disparities in cohort dispersions (Kang et al., 2017a).

#### 4 **Permutation Test on Sibling Pair Differentials**

5 In addition to community level trends, we investigated differential abundances of specific taxa. We ran a permutation test  
6 on mean taxa abundance differences between sibling pairs to determine if any taxa were systematically enriched or  
7 depleted in our ASD samples when compared to our NT controls. We selected DeSeq2 as a normalization method to  
8 minimize batch effect and noise from differences in sampling depth while maintaining the expected dataset properties  
9 (Faith and Baker, 2006). We expected that the microbiome compositions of age-matched sibling pairs would be closer to  
10 each other than to any other samples in the cohort, due to the environmental and genetic similarities shared by young  
11 siblings living within the same household. Additionally, we resampled and resequenced samples from eight individuals,  
12 with at least six months in between samplings, to examine the similarities of the results and confirm that the quality of the  
13 samples was maintained over time. Just as in the case of siblings, we expected samples from the same individual to  
14 contain microbiome compositions very similar to each other. We investigated the suitability of three commonly used  
15 normalization techniques: CSS normalization, DeSeq2 normalization, and log transformation, and found that DeSeq2 best  
16 matched above stated expectations (SI 2). This method performs variance stabilization to normalize counts with respect to  
17 library size and heteroskedasticity (Wilcoxon et al., 1963).

18  
19 We first excluded all samples that were singletons resulting from quality control or from third siblings (sibling furthest in  
20 age was removed). We were left with 55 sibling pairs, each sequenced on the same day, on the same instrument and to  
21 similar depths. Using DeSeq2 normalized taxa abundances, counts in the NT siblings were subtracted from those in the  
22 ASD siblings and averaged across all samples for each taxon. For each taxon, we simulated a null distribution of the  
23 average sibling differences by repeating the above procedure with permuted sibling pairs and phenotype assignments  
24 10000 times. Lastly, we calculated a p-value as the number of times the null hypotheses produced a value more extreme  
25 than the actual value observed (see SI 8).



$$p = 2 * \min(\# \text{ of times null values} < \text{actual values}, \# \text{ of times null values} > \text{actual values})/10,000$$

Null distributions remained stable well before 10000 permutations. We assessed stability by comparing the value of the ks test statistic to the null distribution shapes at increments of 500 simulations. At 10,000 simulations, the maximal ks test statistic over all taxa (when increasing from 9000 to 10000 simulations) was  $4.8 * 10^{-3}$ .

## Models to Maximize the Likelihood of Detecting Low Abundance Species

Given the sparsity of 16S sequencing due to sequencing depth limitations, we used differential ribosomal analysis based on the negative binomial distribution and zero inflated Gaussian analysis, to estimate log-fold changes of taxa abundances between our ASD and NT groups (Dixon, 2003).

### Differential Ribosomal Analysis Based on the Negative Binomial Distribution

We performed differential analysis of taxa counts between groups by modeling taxa abundances under a negative binomial model using the DESeq2 framework. This method performs variance stabilization on taxa counts and then fits a generalized linear model with a log link on normalized count data. Coefficients representing the log fold changes of taxa between groups are then extracted and shrunk toward zero using an empirical Bayes model that effects taxa with low counts more severely. The method then calculates each shrunken log fold change's standard error from the curvature of its posterior and performs a Wald test (Wald, 1943) to determine whether the log fold change of any one taxa is significantly different from zero. The p-values associated with each taxon are corrected for multiple hypotheses using false discovery rate (FDR) (Benjamini and Hochberg, 1995).

### Zero Inflated Gaussian Analysis

To account for sparsity due to under-sampling, we used the method developed by Paulson *et al.*: a mixture model that uses a zero-inflated gaussian distribution to account for varying depths of coverage Paulson:2013hk}. To model data appropriately under a zero-inflated Gaussian model, it was necessary to normalize data in a way that does not change the distribution of the variance of taxa across samples. We used cumulative sum scaling (CSS) (Paulson et al., 2013). to account for under-sampling and increase the sensitivity and specificity of identifiable taxa. CSS is a technique that mitigates bias coming from features that are preferentially amplified in a sample-specific manner. CSS divides the feature counts for each sample by the sum of feature counts with values less than that of the median (or chosen percentile), rather than by the total counts in that sample (as in total-sum normalization). Counts are then multiplied by a normalization constant that is the same across samples to ensure normalized counts have interpretable units. The method models each taxon count as a mixture model of a point mass at zero and a normal distribution parameterized by the observed taxa distribution.

### Functional Profile Prediction using Piphillan

We inferred metabolic activity using Piphillan (Iwai et al., 2016), a bioinformatics software package designed to predict metagenome functional content from marker gene (16S) surveys. Piphillan aligns 16S sequences to sequences in the GreenGenes database (DeSantis et al., 2006), and assigns functional profiles based on 97% match of 16S sequences. 16S

1 sequences that do not match a database entry are assigned the functional profile of their nearest neighbor. We chose this  
2 software over other alternatives, such as PiCRUST (Langille et al., 2013) and Tax4Fun (Abhauer et al., 2015), because of  
3 its high performance on clinical samples and its usage of the most current GreenGenes database. Piphillan was run on  
4 DESeq2 normalized data to produce estimates of KEGG ortholog abundances (Kanehisa and Goto, 2000; Kanehisa et al.,  
5 2016; 2017). We then performed a modified gene enrichment analysis: a set was considered a metabolic pathway as  
6 defined by the KEGG Brite database and an element was considered a KEGG ortholog (Subramanian et al., 2005).

### 7 8 **Gene Set Enrichment Analysis Using KEGG Orthologs**

9 Using KO prediction provided by Piphillan, we distilled the data to define functional pathways as described by the KEGG  
0 database <<http://www.kegg.jp/kegg/pathway.html>> (Kanehisa and Goto, 2000). As some KOs contribute to multiple  
1 pathways, we first divided the abundance of each KO in a sample by the number of pathways the KO participates in, so  
2 that a single functional unit's activity or output may contribute to only one pathway at a time (as a rule of thumb). Then  
3 we used the Gage implementation of Gene Set Enrichment Analysis (GSEA) (Luo et al., 2009) to perform a modified  
4 gene enrichment analysis: a set was considered a metabolic pathway as defined by the KEGG Brite database and an  
5 element was considered a KEGG ortholog (Subramanian et al., 2005).

### 6 7 **Power Calculation**

8 We modeled microbial abundances as a Dirichlet-Multinomial, a model which has been proven to successfully reflect the  
9 abundances seen in naturally occurring microbial communities (La Rosa et al., 2012). Under this model, we estimated  
10 Method-of-Moments (MoM) parameters for each taxon and determined the stability of those estimates by comparing  
11 likelihood-ratio-test statistics over 1000 Monte-Carlo simulations (Mooney, 1997). From this simulation, we can  
12 determine the number of samples necessary to reach a given level of power when estimating parameter values. At a  
13 rejection threshold value of 0.05, n=70 ASD child-subjects and n=70 NT subjects were required to obtain power above  
14 0.99, and n=45 ASD child-subjects and n=45 NT child-subjects was sufficient to provide a power greater than 0.95.  
15 Though we do not explicitly use the Dirichlet-Multinomial model in further analyses, a high power in this context implies  
16 a high power in more complex down-stream analyses that are not able to be simulated.

## 17 18 **RESULTS**

### 19 **Crowd Sourcing Recruitment and Participant Demographics**

20 Between March 2015 and September 2017, 20,478 unique users visited our study website, 1,953 were electronically  
21 screened for eligibility by survey, and 297 of them met our study inclusion criteria. 194 users electronically consented to  
22 participate, and 164 began responding to the online surveys. Of 164 participants, 100 completed the online component and  
23 were mailed sampling kits. 71 families, or parents of 142 sibling pairs, completed the online and at-home sampling  
24 procedures for the study, and 117 child-subjects (60 ASD and 57 NT) met all eligibility criteria, including the required  
25 confirmation of diagnosis obtained from the MARA and video classifier, when submitted. Of the 117 child-subjects, there  
26 were 55 sibling pairs, two sibling pairs were accompanied by a third sibling with autism, and 5 were singleton samples.

1 The ASD cohort comprised 72% male participants (n = 43), as compared to 55% of the NT cohort (n=27). Dietary and  
2 lifestyle questionnaires were completed, in entirety, for 106 of the 117 participants. Among the 106 child-subjects, 66%  
3 (n=79) identified as Caucasian, 7.5% (n=8) identified as Asian or Pacific Islander, 3.8% (n=4) identified as African  
4 American, and 7.5% (n=8) identified as Hispanic (participants were also given the option to select more than one  
5 identifying ethnicity, not reported here). Participant age was not significantly different between the ASD and NT cohorts.  
6 Additional demographic data are in Supplementary Information SI 4.

### 7 **ASD Diagnosis Confirmation using the Mobile Autism Risk Assessment (MARA) and Video Classifier**

8 All child-subjects with ASD that completed the MARA and of these 29 provided scorable video (including one family  
9 with two siblings with ASD and one NT sibling meeting the age criteria). There was a 100% agreement in class  
0 assignment between the MARA and the video classifier in all 37 cases (SI 3). In 12 instances, the output from either or  
1 both classifier (2 supported by the video classifier) did not confirm the parent-reported ASD diagnosis. These participants  
2 were therefore excluded from analysis. The results reported hereafter include only the remaining 60 child-subjects with  
3 confirmed ASD.  
4

### 5 **Diet Differences between Children with ASD and Neurotypical Siblings**

6 We found three categorical factors (supplements, dairy intolerance, and dietary restrictions) to be significantly different  
7 between the two cohorts according to a chi-square test (Table 1). Nutritional/herbal supplements showed significant  
8 differences between the two cohorts, with 63.6% (n=35) ASD child-subjects taking an herbal supplement as compared to  
9 35.3% (n=18) NT child-subjects (qval 2.3e-2). Dairy intolerance was also more prevalent in the ASD cohort (n=1 NT  
10 child-subjects versus n=16 ASD child-subjects) (qval 2.6e-3), which correlates with a statistically significant deviation in  
11 the frequency of consumption of both milk/cheese and milk substitutes: only 33.3% (n=18) of ASD child-subjects  
12 consumed milk/cheese on a “regular” or “daily” basis as compared to 72 % (n= 36) of NT child-subjects (qval 2.3e-3).  
13 Finally, gluten intolerance was found to be more prevalent in the ASD cohort (qval 3.5e-4). Additionally, n=20 ASD  
14 child-subjects had other special dietary restrictions apart from dairy and gluten constraints, compared to only n=6 NT  
15 child-subjects (qval 2.3e-3). Refer to Table 1 and Supplementary Information SI 4 for a summary of the remaining  
16 reported data.  
17

### 18 **Dietary and Lifestyle Habits Influencing the Microbial Community**

19 SI 12 detailed the five variables that seems to significantly influence the microbial community: Probiotics, Multi-vitamin,  
20 sugary sweet, olive oil and sequencing batch. Constraint PcoA were used to identify the ESVs for which the abundance was  
21 the most influenced by these variables (SI 13).  
22

### 23 **Similarity between Sibling Lifestyles**

24 As hypothesized, sibling lifestyles, as measured by dietary choices, supplement intake, exercise, allergies, and other  
25 factors, were significantly more similar to each other than to other participants (p << .01). We used the Euclidean distance  
26 between lifestyle description vectors to perform a permutation test (999 permutations), which confirmed the similar  
27 sibling lifestyle hypothesis. (SI 5).  
28

## Reported Gastrointestinal Symptoms

As reported above, we observed significant differences in gluten and dairy intolerances, which imply greater propensity for GI abnormalities among the ASD cohort. We did not, however, observe any significant differences between our cohorts regarding the reported gastrointestinal motility (SI 6) nor the frequency distribution of bowel movements (two-sample Wilcoxon signed-rank, p-value = 0.8313). Grouping samples into stool categories “Frequent”(> once a day), “Typical” (once a day) and “Sparse”(< once a day) did not result in any significant interdependence of phenotype and bowel movement frequency. When samples were agglomerated into two categories, typical bowel movement (one per day) and abnormal bowel movement (less or more than one per day), we did observe a slight, though not statistically significant, trend in the ASD cohort towards increase abnormal bowel movement frequency (chi-square p= 0.17).

## Microbial Alpha-Diversity

We calculated the phylogenetic diversity (PD) and Shannon diversity metric for each sample (Cadotte et al., 2010). Grouping diversity measurements into “low”, “medium” and “high” categories based on observed standard deviation, we see a significant relationship between phenotype and diversity (fisher-exact p = 0.01), with high diversity associated with ASD (Figure 1). However, performing a rank sum test using each metric, we found no significant difference between cohorts. Although the variance of diversity (distribution of scores) in the ASD cohort was significantly greater than the NT cohort (bootstrap p < .001; Figure 1). Shannon diversity was also significantly related to bowel movement quality (fisher-exact p = .02), with low diversity associated with diarrhea, but not significantly related to bowel movement frequency (fisher-exact p = .17)

## Permutation Test on Sibling Pairs to determine ESVs that differentiate between ASD and NT.

Ten ESVs were determined to be differentially abundant between sibling pairs (ASD vs. NT) as determined by a permutation test with FDR correction (Table 2; SI 7). The mean differential abundance drawn from the null distribution was never more extreme than the actual differential abundance mean, and all p-values were 0, and increased to  $9.36 \times 10^{-3}$  upon correction (see distribution plot in SI 8). The genera *Aggregatibacter*, *Anaerococcus* and *Oscillospira* were significantly enriched in the ASD cohort, while *Porphyromonas*, *Slackia*, *Desulfovibrio*, *Clostridium colinum*, and *Acinetobacter johnsonii* were enriched in the NT cohort.

## Models to Maximize the Likelihood of Detecting Low Abundance Species

We implemented a mixture model using a zero-inflated Gaussian (ZIG) distribution of mean group abundance for each ESV in metagenomeSeq (Paulson et al., 2013), in order to quantify the fold change in taxa between the ASD cohort and the NT cohort. This analysis again revealed 10 ESVs differentially present in the two cohorts: four were enriched in the ASD cohort (Table 2), and six were enriched in the NT cohort. The NT cohort was enriched in the Lachnospiraceae (five of six ESVs), including *Coproccoccus catus*, *Clostridium colinum*, and the genera *Bifidobacterium*. In comparison, the ASD cohort was enriched in *Ruminococcus* and *Holdemania*, as well as the species *Bacteroides uniformis* and *Clostridium celatum*.

1 We also used a Negative Binomial Distribution Analysis to Identify *ESV between ASD and NT*, through which we  
2 identified a single ESV, from the genus *Bacteroides* (ESV1), enriched in the ASD cohort. Among the aforementioned  
3 statistical analyses, the microbial genus types identified in more than one statistical abundance test in the ASD cohort  
4 included the family *Ruminococcaceae* (by three ESVs including the genera *Oscillospira* and *Ruminococcus*), and the  
5 genus *Bacteroides* (by two ESVs). The NT cohort presents six ESVs belonging to the family *Lachnospiraceae*.

## 7 **Functional Profile Prediction**

8 The software Piphillan predicted ~6900 active KEGG Orthologs (KO) that were part of ~170 metabolic pathways as  
9 defined by KEGG Brite. Overall, we were able to associate 105 ESVs with full genome annotations. From the predicted  
0 KOs that were present in these genomes, we observed 17 predicted metabolic pathways with significantly differential  
1 abundance between ASD and NT. Two pathways were significantly enriched in the ASD cohort: Flagellar assembly  
2 (ko02040), and Aminoacyl-tRNA biosynthesis (ko00970) (Figure 2). Fifteen pathways were significantly enriched in the  
3 NT cohort, including Butanoate metabolism (ko00650), Propanoate metabolism (ko00640), Sulfur metabolism (ko00920),  
4 Phosphotransferase system (ko02060), and microbial metabolism in diverse environments (ko01120). A full list of  
5 significantly differential pathways is in Figure 2.

## 7 **DISCUSSION**

### 8 **Crowdsourcing Recruitment**

9 By targeting the Internet-active autism community, we were able to crowdsource study subject recruitment and reach our  
0 targeted sample size for each cohort in a short amount of time. This methodology allowed us to collect data efficiently and  
1 effectively and to recruit participants from diverse geographical areas.

### 3 **Lifestyle, Dietary Practices and GI symptoms**

4 This study highlights ASD biomarker candidates while minimizing the impact of confounding environmental factors by  
5 crowdsourcing recruitment of ASD child-subjects who have age-matched NT siblings to act as study controls. By  
6 recruiting only sibling pairs who are within 2 years of age of one another, living in similar home environments, and eating  
7 similar diets (see SI 5), we successfully controlled for diet and lifestyle among our two cohorts. Using this approach of  
8 working with sibling cohorts, other studies have also showed very similar microbial structure between the two cohorts  
9 (Gondalia et al., 2012) to the point of not being able to identify taxa specific to one or the other cohort.

10 We observed no overlap between factors that heavily influence the microbial structure (SI 12) and the factors that were  
11 significantly different between the ASD and the NT cohorts (Table 1). Therefore, it is unlikely that the ESVs identified as  
12 ASD or NT biomarkers were differentially abundant due to diet or lifestyle as confounding influences.

13 We did not observe significant differences in the GI motility or stool quality between cohorts, however, there was an  
14 increased prevalence of dairy and gluten sensitivities among ASD child-subjects which may imply a propensity for GI  
15 distress. Dairy and gluten sensitivities have been previously found to be associated with children with ASD (Williams et  
16 al., 2011; Lau et al., 2013; Vuong and Hsiao, 2017). We also observed an increase in special dietary restrictions among

1 our ASD child-subjects, which could imply that many parents had already implemented limitations to their child's diet to  
2 alleviate any potential or previously identified gastrointestinal issues. Perhaps due to high parent involvement, we did not  
3 observe the expected differences in GI motility or gastrointestinal abnormalities. Failure to detect systematic GI distress in  
4 ASD could also be attributed to differences in study populations, as older siblings with wider intervals in age as were  
5 included in Son *et al.* are more likely to have more variable lifestyles and therefore greater differences in GI state.

### 7 **Microbial Community Diversity**

8 There is much debate in the literature as to whether microbial diversity is significantly different in children with ASD  
9 versus neurotypically developing children. While we found no significant rank sum relationship between alpha diversity  
0 of the microbiota and ASD diagnosis, we observed a significant relationship when considering samples as “High”,  
1 “Medium”, or “Low” diversity. This finding implies that more or less gut microbiome diversity does not directly translate  
2 to more or less benefit in the case of ASD, but rather that diversity should be viewed more broadly as a general  
3 contributing metric. The variance in diversity scores was significantly greater in the ASD cohort compared with the NT  
4 cohort, which may explain some of the discrepancies seen in smaller cohort studies such as those conducted by Finegold  
5 *et al.* (2010), Kang *et al.* (2017), and Hsiao *et al.* (2013), which respectively report increased, decreased, and unchanged  
6 microbial diversity in an ASD cohort. Notably, in our ASD cohort, low diversity seemed strongly related to parent-  
7 reported diarrhea occurrences. Therefore, it is possible that studies that specifically enrich for significant gut abnormalities  
8 when recruiting ASD subjects may unwittingly enrich for decreased ASD microbial diversity. This finding of greater  
9 variance in the diversity of ASD microbiota suggests that perhaps the ‘Anna Karenina principle’ is at work in ASD,  
10 whereby there are more ways to be dysbiotic than non-dysbiotic, hence it is more probable to identify a greater range of  
11 alpha diversity scores in dysbiotic individuals Zaneveld:2017ii}.

### 13 **Differential abundance analysis of microbial species**

14 This study was designed to include controls that match as exactly as possible the lifestyle and environment of the autism  
15 samples in order to allow for better reproducibility and more robust association exploration. There is a concern that fecal  
16 bacteria from ASD cases could transfer to neurotypical control siblings, thus obscuring signal and not allowing us to  
17 observe differences between the ASD typified gut and the neurotypical gut (Finegold *et al.*, 2010). This may be the case;  
18 however, this type of contamination only serves to obscure signal, not to create spurious results. Therefore, while there  
19 may be true biological associations not reported here, the associations observed from this cohort are not likely to be  
20 spurious.

21 To improve the taxonomic resolution of the analyses, this study relied exclusively on ESVs, meaning the taxonomic  
22 comparisons were performed without any clustering of 16S rRNA amplicon sequences (Table 2) (Callahan *et al.*, 2016).  
23 Importantly it also produces single sequence variants which can be reproducibly detected between studies and across  
24 sequencing runs, reducing potential batch effects and improving future meta-analyses (Callahan *et al.*, 2017).

25 It should be noted that while increased resolution can help improve reproducibility, no singular species, genus, or family  
26 can be considered homogeneous, and the functioning of any microbial group can vary widely based on circumstances  
27 including most recent diet, influence of other microbial community members, and strain level variation. The same species

1 can manifest different effects on host physiology, but we report here cohort-wide associations that appear robust in a large  
2 subset of our population.

### 3 4 ***ESVs enriched in the ASD cohort***

5 We provided in Table 3 & Table 4 a comprehensive list of biological information and information related to other reports  
6 on each bacterial associations with ASD and other pertinent phenotypes. Our findings agree overall with literature that  
7 states that *Bacteroides* genus and families such as Erysipelotrichaceae and Clostridiaceae (member of Clostridial cluster I)  
8 have already been widely reported as enriched in ASD (see Table 3). We also observed that members of Clostridial cluster  
9 IV (genus *Ruminococcus*), and ESV5 which belongs to the family Pasteurellaleae, are both enriched in the ASD cohort.  
0 This entire family was previously reported as being depleted in ASD participants (Kang et al., 2017b); this discrepancy  
1 could be explained by the study's aggregation of all Pasteurellaleae, while we implicate a single member of the family.  
2 Pasteurellaleae was also detected as one of the most abundant bacterial family in children with developmental disabilities  
3 in Japan (Naka et al., 2009), supporting its potential association with atypical behavioral phenotypes. Finally, we also  
4 found that the genus *Anaerococcus* (ESV5) was enriched in the ASD cohort which to our knowledge, has not yet been  
5 reported in previous research literature.

### 6 7 ***ESVs depleted in the ASD cohort***

8 Our analysis identified five ESVs belonging to the Lachnospiraceae family that are depleted in the ASD cohort and  
9 enriched in the neurotypical cohort. This family overall has already been reported as associated with autism phenotype  
10 (see Table 3). Of these ESVs, the RDP classifier was only able to assign two species names, and we were only able to  
11 identify three genomes carrying similar ribosomal sequences (Table 2), indicating that we may have identified novel  
12 variants from our analyses (Euzéby, 2010; Yoon et al., 2017). These homogeneous phylogenetic groups of ESVs seem  
13 especially interesting as they cluster near each other on the 16S rRNA phylogenetic tree (Figure 3). Additionally, members  
14 from the *Clostridial* cluster IV were associated with ASD, while members from the *Clostridial* cluster XIVa were  
15 associated with the control cohort. We could hypothesize that these two families exhibit metabolic pathways that are  
16 distinct among their functional redundancies. As microbes from this genus are some of human gut-associated  
17 microbiomes main butyrate producers, we examine the differences in butyrate production pathways of these two clusters  
18 in our pathway analysis below.

19 The genera *Desulfovibrio* and *Bifidobacterium* were also depleted in the ASD cohort, consistent with results from at least  
20 3 other studies (see table 3). *Bifidobacterium* has been characterized for its ability to normalize gut permeability  
21 (Desbonnet et al., 2008), and lack of this genus has been hypothesized to facilitate translocation of harmful microbial  
22 metabolites from the gut to the blood. Our analysis also pinpoints the possible importance of the genus *Slackia* in the  
23 neurotypical cohort, which was depleted in our ASD cohort. Finally, we identified two more families depleted in the ASD  
24 cohort, Porphyromonadaceae and Moraxellaceae, which respectively produce butyrate or use it as the sole source of  
25 carbon.

### 26 27 **Pathway analysis**

Using the pipeline Piphillin (Iwai et al., 2016) to infer KOs from our ESVs, and performing a GSEA using the KOs, we identified 17 predicted pathways associated with either cohort. Predicted pathway abundance in this analysis is defined by the relative potential capacity of a present bacterial genome to produce any active enzymes in a given biological pathway. It should be noted that connecting enriched predicted pathways to the potential biomarker ESVs reported can be tenuous, as Piphillin was only able to match 6 of our 21 markers to full genomes and extract their associated KOs. Notable differentially predicted pathways include (1) butanoate metabolism, glycolysis and pyruvate metabolism, (2) propanoate metabolism, (3) sulfur metabolism, (4) aminoacyl-tRNA biosynthesis, (5) the phosphotransferase system, and (6) microbial metabolisms in diverse environments. Additionally predicted pathways comprised more general functions (e.g., biosynthesis of antibiotics, biosynthesis of secondary metabolites, carbon metabolism, and two-component system pathways) or were only detected in one ESV biomarker (e.g. flagellar assembly).

## **Butyrate Production Pathway**

The potential role of short chain fatty acids (SCFAs) in autism has been discussed in multiple studies. Wang et al. reported elevated SCFA concentration in children with ASD (Wang et al., 2012), while two other studies reported the opposite trend when looking at total SCFAs (Adams et al., 2011; De Angelis et al., 2013). MacFabe *et al.* found that intravenous administration of the SCFA propionate induced ASD typified behavior in mouse models, though it is likely that propionate injected intravenously may have a different effect compared with propionate originating from GI-microbial fermentation (Macfabe, 2013). Butyrate, in particular, has been proposed as a potential major mediator of the gut-brain axis either through modulation of the density of cholinergic enteric neurons through epigenetic mechanisms, or through direct modulation of the vagus nerve and hypothalamus (Liu et al., 2018). In our cohort, we observe an enrichment of microbial genomes capable of butyrate metabolism, implying that butyrate production and consumption pathways, in the stool-microbiome of NT participants (Figure 2). Butyrate production pathways in commensal microbial species and pathogens are thought to have evolved divergently; there are 4 pathways for butyrate production each branching from a different initial substrate: Pyruvate, 4-aminobutyrate, Glutarate, and Lysine (Anand et al., 2016). The by-products and influences of these major butyrogenic pathways could be relevant to host physiology. In our cohort, the predicted bacterial genetic potential in NT samples showed an enrichment for KOs associated with butyrate production from pyruvate, while in the ASD samples, the predicted functional potential was enriched for butyrate production via the 4-aminobutanoate (4Ab) pathway (Figure C). 4Ab is a neurotransmitter and its biosynthesis can directly interfere with the amount of available glutamate (Anand et al., 2016). This pathway can also potentially release harmful by-products such as ammonia (Anand et al., 2016), which were found elevated in feces of children with ASD (Wang et al., 2012). Genes identified as part of the pyruvate biosynthesis pathway were either found in both cohorts or only in predicted genomes associated with biomarkers from the NT cohort (Figure 2) (SI 10 panel B).

**Propionate pathway:** The predicted pathways for the synthesis of propionate, another SCFA, appears depleted in the ASD cohort (Figure C). This pathway has the potential to generate isopropanol, which has recently been found at a significantly greater concentration in the feces of children with autism (Kang et al., 2017b).

**Sulfur Pathway:** The association between the predicted sulfur pathway and the NT cohort, though somewhat surprising, parallels our finding of *Acinetobacter* and *Desulfovibrio* enrichment in the NT cohort. The reactions detailed in SI 10



1 panel D suggest an imbalance within the sulfur cycle, which has already been hypothesized as possible route modulating  
2 the gut-brain interaction in autism (Midtvedt, 2012).

3 **Aminoacyl-tRNA Biosynthesis Pathway:** As expected, the vast majority of the aminoacyl-tRNA biosynthesis pathway  
4 is predicted to be present in all identified ESVs. Some enzymes from this pathway, specifically L-glutamine amido-ligase  
5 directly affect the availability of neurotransmitter precursors (SI 10 panel F) (YIP and KNOX, 1970).

6 **Phosphotransferase system:** We also observed differential abundance of predicted carbohydrate uptake pathways within  
7 the ESVs associated with each cohort: the ESVs associated with ASD seemed to show a much greater variety of  
8 carbohydrate transporters (SI 10 panel G).

9 **Microbial metabolism in diverse environments:** This high level category comprises many different pathways, which  
0 were not individually found enriched in either cohort. It is however interesting to note that this KEGG category is  
1 associated with several metabolites already known in the literature as enriched or depleted in subjects with ASD (Figure  
2 2). Among them were p-cresol (Kang et al., 2017b), and ammonia (De Angelis et al., 2013) that have been found in  
3 greater abundance in the feces of children with autism; SCFAs (propanoate and acetate), which have mixed reports  
4 associating them with either children with ASD or controls (Adams et al., 2011; Wang et al., 2011; De Angelis et al.,  
5 2013); and neurotransmitters such as L-glutamate and GABA, which tend to be respectively greater and lower in feces of  
6 children with ASD, respectively (Kang et al., 2017b). Glutamine, found in greater levels in the plasma of ASD  
7 participants (Kang et al., 2017b), also belongs to this KEGG pathway, as do several metabolites such as nicotinate and  
8 aspartate, another neurotransmitter (Yap et al., 2010; De Angelis et al., 2013; Kang et al., 2017b).

### 9 **Power Calculation and Sample Size**

10 Likelihood-ratio-test statistics for a Dirichlet-Multinomial parameter test comparison showed that to reach an acceptable  
11 power ( $>0.9$ ), we needed to include a minimum of 45 child-subjects per cohort. We were successful at screening,  
12 recruiting, sequencing, and analyzing 60 ASD and 57 NT child-subjects (SI 11). While this analysis does not calculate the  
13 power for each of the tests we performed, the Dirichlet-Multinomial distribution does allow power calculations for  
14 experimental design and population parameter estimations using a fully parametric approach. And though we cannot  
15 relate the verification of sufficient sample size to the non-parametric permutation test, we can conclude that our sample  
16 size is sufficient for reproducibility in the results from the zero-inflated Gaussian and DESeq2 models.

### 17 **Limitations**

18 While these results show promising microbial differences between autism and typically developing children, potential  
19 limitations included reliance on self-reported information, limited identification of species or strain level variants, limited  
20 single time-point sampling, and lack of consideration of host genetic variation.

21 While we safeguarded against self-report bias through two validated machine-learning algorithms that adapt well to  
22 mobile testing, there remains bias in self-report of diagnosis may remain. In particular because we only required MARA  
23 for the child with ASD, we could not confirm the typical development of their siblings. In addition, the compliance with  
24 the optional request for video was slightly under  $<50\%$  of the cohort studied. While it was encouraging to see perfect  
25 alignment between the MARA and the video classifier outcomes, bolstering confidence in the confirmation of self-report,  
26 it would be better to require this dual check for all participants in future work.

1 Although widely used (Kang et al., 2017a), self-reported GI symptoms can also suffer some discrepancies when compared  
2 to a pediatric gastroenterologist reported data (Frye et al., 2015). Furthermore, while we observed physiological  
3 distinctions between the microbiomes of the cohorts on the level of exact sequence variants, it was often not possible to  
4 assign a taxonomic annotation or full genome to these sequences because of incomplete coverage in public databases. As  
5 the predicted pathways discussed were highly dependent on availabilities of full genome information, further metagenome  
6 and multi-Omics analyses in this space will be needed to confirm the metabolic hypotheses presented.

7 Finally, this study only collects one microbiome sample from each participant child and does not consider the influence of  
8 genetic variation between subjects or cohorts. A prospective and longitudinal study, described in Future Work, will  
9 ameliorate these limitations and significantly contribute to our understanding of the gut-brain interactions by accounting  
0 for the host genotype, gut microbiome, phenome, and metabolome of more than 200 age-matched sibling pairs with and  
1 without ASD.

### 2 3 **Future Work**

4 This study has provided potential microbial biomarkers, both taxonomic and functional that associate the stool-associated  
5 microbiome with the ASD phenome. These findings may be due in part to the fact that we were able build a larger sample  
6 than previous studies on the microbiome and ASD, however, it will be necessary to continue sampling this modality in a  
7 larger and even more diverse cohort. Our study confirms that crowdsourcing is a viable and cost effective way to do so.  
8 Thus our future work will take a similar angle but on an expanded population and will additionally move from single to  
9 multi-time-point sampling of the subjects to control for unrelated environmental influences on the gut microbiome. In  
0 addition, future work should combine the microbiome and phenotype, with the genome to enable more precise  
1 stratification of the relationship between microbiota and the Autism Spectrum and improve our understanding of the host-  
2 microbiome interaction as well as facilitate the discovery of more clinically useful autism biomarkers. This study phase  
3 has paved the way towards creating a more robust study where we will incorporate the three aforementioned modalities.  
4 We will also aim to validate whether specific microbial taxa and metabolisms are causally associated with ASD through  
5 improved characterization of the microbiome (e.g. metagenomics, metabolomics, etc.) in human longitudinal studies,  
6 animal studies to demonstrate causation, and human interventional studies that target the microbiome

### 7 8 **Conclusion**

9 The aim of this study was to explore the association between the composition of the gut microbiome and the ASD  
0 phenotype in order to predict mechanism of association and to identify taxonomic and functional biomarkers and targets  
1 for future therapeutic research. Using a novel crowd-sourcing approach, we recruited 71 ASD/NT young sibling pairs,  
2 thereby limiting the confounding factors of age, lifestyle, diet, and genetics. This improves our confidence in the observed  
3 differences in gut bacterial taxa associated with the ASD phenotype. We observed systematic differences in the abundance  
4 of specific microbes between the ASD and NT cohorts, including a depletion of five ESVs from the Lachnospiraceae  
5 family and two ESVs associated with the genera *Desulfovibrio* and *Bifidobacterium* in the ASD cohort, and a difference in  
6 membership of clostridial organisms between the cohorts. Taxonomic assignments for short 16S rRNA fragments cannot  
7 be used to predict the full genetic functional potential of a microbiome, but using conservative methods we predicted the  
8 general functional potential of these microbiota and observed possible differences in the pathways associated with

1 butyrate synthesis, potential harmful by-product and associated neurotransmitter production, that warrants further  
2 examination. The observed predicted differences in stool-associated microbial metabolic potential between ASD and NT  
3 siblings are worthy of future investigation into causality, and could represent opportunities for therapeutic intervention.  
4

#### 5 **Competing interests**

6 JAG is the cofounder and chief scientific advisor for Gusto Global LCC, in which he owns equity. DPW is cofounder of  
7 Cognoa, a company focused on digital methods for healthy child development. MMD is the co-founder of ENOVEO a  
8 company specialized in environmental microbiology.  
9

#### 0 **Acknowledgements:**

1 The work was supported in part by funds to DPW from NIH ([1R01EB025025-01](#) & [1R21HD091500-01](#)), The Hartwell  
2 Foundation, Bill and Melinda Gates Foundation, Coulter Foundation, Lucile Packard Foundation, and program grants  
3 from Stanford's Precision Health and Integrated Diagnostics *Center (PHIND)*, Beckman Center, Bio-X Center,  
4 Predictives and Diagnostics Accelerator (SPADA) Spectrum, and Child Health Research Institute. We also acknowledge  
5 generous support from David Orr, Imma Calvo, Bobby Dekesyer and Peter Sullivan.  
6  
7

## References

- Adams JB, Johansen LJ, Powell LD, Quig D, Rubin RA. Gastrointestinal flora and gastrointestinal status in children with autism--comparisons to typical children and correlation with autism severity. *BMC Gastroenterol.* 2011;11:22. PMID: PMC3072352
- Adams JB, Romdalvik J, Levine KE. Mercury in first-cut baby hair of children with autism versus typically-developing children. *Toxicological & ...* 2008.
- Anand S, Kaur H, Mande SS. Comparative In silico Analysis of Butyrate Production Pathways in Gut Commensals and Pathogens. *Front Microbiol. Frontiers;* 2016;7(e0142038):1945. PMID: PMC5133246
- Aßhauer K, Bernd W, Rolf D, Meinicke P. OP-CBIO150298 2882..2884. Hofacker I, editor. *Bioinformatics [Internet].* 2015 Aug 19;31(17):2882–4. Retrieved from: <https://www.ncbi.nlm.nih.gov/stanford.idm.oclc.org/pmc/articles/PMC4547618/pdf/btv287.pdf>
- Baio J, Wiggins L, Christensen DL, Maenner MJ, Daniels J, Warren Z, et al. Prevalence of Autism Spectrum Disorder Among Children Aged 8 Years - Autism and Developmental Disabilities Monitoring Network, 11 Sites, United States, 2014. *MMWR Surveill Summ.* 2018 Apr 27;67(6):1–23. PMID: PMC5919599
- Behrend TS, Sharek DJ, Meade AW, Wiebe EN. The viability of crowdsourcing for survey research. *Behav Res Methods.* 2011 Sep;43(3):800–13.
- Benjamini, Hochberg Y. Controlling the False Discovery Rate: A practical and powerful approach to Multiple Testing. *Journal of the royal Statistical Society.* 1995 May 17;:289–300.
- Bercik P, Park AJ, Sinclair D, Khoshdel A, Lu J, Huang X, et al. The anxiolytic effect of *Bifidobacterium longum* NCC3001 involves vagal pathways for gut-brain communication. *Neurogastroenterol. Motil.* 2011 Dec;23(12):1132–9. PMID: PMC3413724
- Boukthir S, Matoussi N, Belhadj A, Mammou S, Dlala SB, Helayem M, et al. [Abnormal intestinal permeability in children with autism]. *Tunis Med.* 2010 Sep;88(9):685–6.
- Bravo JA, Forsythe P, Chew MV, Escaravage E, Savignac HM, Dinan TG, et al. Ingestion of *Lactobacillus* strain regulates emotional behavior and central GABA receptor expression in a mouse via the vagus nerve. *Proc. Natl. Acad. Sci. U.S.A.* 2011 Sep 20;108(38):16050–5. PMID: PMC3179073
- Bruce-Keller AJ, Salbaum JM, Luo M, Blanchard E, Taylor CM, Welsh DA, et al. Obese-type gut microbiota induce neurobehavioral changes in the absence of obesity. *Biol. Psychiatry.* 2015 Apr 1;77(7):607–15. PMID: PMC4297748
- Cadotte MW, Jonathan Davies T, Regetz J, Kembel SW, Cleland E, Oakley TH. Phylogenetic diversity metrics for ecological communities: integrating species richness, abundance and evolutionary history. *Ecol. Lett. Blackwell Publishing Ltd;* 2010 Jan;13(1):96–105.
- Callahan BJ, McMurdie PJ, Holmes SP. Exact sequence variants should replace operational taxonomic units in marker-gene data analysis. *ISME J. Nature Publishing Group;* 2017 Dec;11(12):2639–43. PMID: PMC5702726
- Callahan BJ, McMurdie PJ, Rosen MJ, Han AW, Johnson AJA, Holmes SP. DADA2: High-resolution sample inference from Illumina amplicon data. *Nat. Methods. Nature Publishing Group;* 2016 May 23;13(7):581–3. PMID: PMC4927377
- Caporaso JG, Caporaso JG, Lauber CL, Lauber CL, Walters WA, Walters WA, et al. Global patterns of 16S rRNA diversity at a depth of millions of sequences per sample. *Proc. Natl. Acad. Sci. U.S.A. [Internet].* 2011 Mar 15;108(Supplement\_1):4516–22. Retrieved from: <http://eutils.ncbi.nlm.nih.gov/entrez/eutils/elink.fcgi?dbfrom=pubmed&id=20534432&retmode=ref&cmd=prlinks>
- Caporaso JG, Lauber CL, Walters WA, Berg-Lyons D, Huntley J, Fierer N, et al. Ultra-high-throughput microbial community analysis on the Illumina HiSeq and MiSeq platforms. *ISME J.* 2012 Aug;6(8):1621–4. PMID: PMC3400413
- Comber AJ, Brunson C, See LM, Fritz S, McCallum I. Comparing Expert and Non-expert Conceptualisations of the Land - An Analysis of Crowdsourced Land Cover Data. *COSIT. Cham: Springer International Publishing;* 2013;8116(Chapter 14):243–60.
- David MM, Babineau BA, Wall DP. Can we accelerate autism discoveries through crowdsourcing? *Research in Autism Spectrum Disorders.* 2016 Dec;32:80–3.
- De Angelis M, Piccolo M, Vannini L, Siragusa S, De Giacomo A, Serrazanetti DI, et al. Fecal microbiota and metabolome of children with autism and pervasive developmental disorder not otherwise specified. *Heimesaat MM, editor. PLoS ONE. Public Library of Science;* 2013;8(10):e76993. PMID: PMC3793965

- 1 de Magistris L, Familiari V, Pascotto A, Sapone A, Frolli A, Iardino P, et al. Alterations of the intestinal barrier in patients  
2 with autism spectrum disorders and in their first-degree relatives. *J. Pediatr. Gastroenterol. Nutr.* 2010 Oct;51(4):418–  
3 24.
- 4 DeAngelis KM, D'haeseleer P, Chivian D, Simmons B, Arkin AP, Mavromatis K, et al. Metagenomes of tropical soil-  
5 derived anaerobic switchgrass-adapted consortia with and without iron. *Standards in genomic sciences* [Internet].  
6 2013;7(3):382–98. Retrieved from:  
7 <http://eutils.ncbi.nlm.nih.gov/entrez/eutils/elink.fcgi?dbfrom=pubmed&id=24019987&retmode=ref&cmd=prlinks>
- 8 DeSantis TZ, Hugenholtz P, Larsen N, Rojas M, Brodie EL, Keller K, et al. Greengenes, a chimera-checked 16S rRNA  
9 gene database and workbench compatible with ARB. *Appl. Environ. Microbiol.* 2006 Jul;72(7):5069–72. PMID:  
0 PMC1489311
- 1 Desbonnet L, Garrett L, Clarke G, Bienenstock J, Dinan TG. The probiotic *Bifidobacteria infantis*: An assessment of  
2 potential antidepressant properties in the rat. *J Psychiatr Res.* 2008 Dec;43(2):164–74.
- 3 Di Gioia D, Aloisio I, Mazzola G, Biavati B. *Bifidobacteria*: their impact on gut microbiota composition and their  
4 applications as probiotics in infants. *Appl Microbiol Biotechnol.* Springer Berlin Heidelberg; 2014 Jan;98(2):563–77.
- 5 Dixon P. VEGAN, a package of R functions for community ecology. *Journal of Vegetation Science.* 2003 Dec;14(6):927–  
6 30.
- 7 Downs R, Perna J, Vitelli A, Cook D, Dhurjati P. Model-based hypothesis of gut microbe populations and gut/brain  
8 barrier permeabilities in the development of regressive autism. *Med. Hypotheses.* 2014 Dec;83(6):649–55.
- 9 Duda M, Daniels J, Wall DP. Clinical Evaluation of a Novel and Mobile Autism Risk Assessment. *J Autism Dev Disord.*  
0 2016 Jun;46(6):1953–61. PMID: PMC4860199
- 1 Duda M, Kosmicki JA, Wall DP. Testing the accuracy of an observation-based classifier for rapid detection of autism  
2 risk. *Transl Psychiatry.* 2014;4:e424. PMID: PMC4150240
- 3 Euzéby J. List of new names and new combinations previously effectively, but not validly, published. *Int. J. Syst. Evol.*  
4 *Microbiol. Microbiology Society;* 2010 May;60(Pt 5):1009–10.
- 5 Ezaki T, Kawamura Y, Li N, Shu S, Li ZY, Zhao L. Proposal of the genera *Anaerococcus* gen. nov., *Peptoniphilus* gen.  
6 nov. and *Gallicola* gen. nov. for members of the genus *Peptostreptococcus*. *Int. J. Syst. Evol. Microbiol.* [Internet].  
7 2001 Jul 1;51(4):1521–8. Retrieved from:  
8 <http://eutils.ncbi.nlm.nih.gov/entrez/eutils/elink.fcgi?dbfrom=pubmed&id=11491354&retmode=ref&cmd=prlinks>
- 9 Faith DP, Baker AM. Phylogenetic diversity (PD) and biodiversity conservation: some bioinformatics challenges. *Evol.*  
0 *Bioinform. Online. Libertas Academica Ltd;* 2006;2:121–8. PMID: PMC2674678
- 1 Finegold SM. State of the art; microbiology in health and disease. *Intestinal bacterial flora in autism. Anaerobe.* 2011  
2 Dec;17(6):367–8.
- 3 Finegold SM, Dowd SE, Gontcharova V, Liu C, Henley KE, Wolcott RD, et al. Pyrosequencing study of fecal microflora  
4 of autistic and control children. *Anaerobe.* 2010 Aug;16(4):444–53.
- 5 Finegold SM, Molitoris D, Song Y, Liu C, Vaisanen M-L, Bolte E, et al. Gastrointestinal microflora studies in late-onset  
6 autism. *Clin. Infect. Dis.* 2002 Sep 1;35(Suppl 1):S6–S16.
- 7 Frank DN, St Amand AL, Feldman RA, Boedeker EC, Harpaz N, Pace NR. Molecular-phylogenetic characterization of  
8 microbial community imbalances in human inflammatory bowel diseases. *Proc. Natl. Acad. Sci. U.S.A.* 2007 Aug  
9 21;104(34):13780–5. PMID: PMC1959459
- 0 Friedman SD, Shaw DW, Artru AA, Richards TL, Gardner J, Dawson G, et al. Regional brain chemical alterations in  
1 young children with autism spectrum disorder. *Neurology.* 2003;60(1):100–7.
- 2 Frye RE, Rose S, Slattery J, Macfabe DF. Gastrointestinal dysfunction in autism spectrum disorder: the role of the  
3 mitochondria and the enteric microbiome. *Microb. Ecol. Health Dis.* Taylor & Francis; 2015;26(0):27458. PMID:  
4 PMC4425813
- 5 Fukuda S, Toh H, Hase K, Oshima K, Nakanishi Y, Yoshimura K, et al. *Bifidobacteria* can protect from enteropathogenic  
6 infection through production of acetate. *Nature.* Nature Publishing Group; 2011 Jan 27;469(7331):543–7.
- 7 Fusaro VA, Daniels J, Duda M, Deluca TF, D'Angelo O, Tamburello J, et al. The potential of accelerating early detection  
8 of autism through content analysis of YouTube videos. *PLoS ONE.* 2014;9(4):e93533. PMID: PMC3989176
- 9 Gardener H, Spiegelman D, Buka SL. Prenatal risk factors for autism: comprehensive meta-analysis. *Br J Psychiatry.*  
0 2009 Jul;195(1):7–14. PMID: PMC3712619
- 1 Gilbert JA, Krajmalnik-Brown R, Porazinska DL, Weiss SJ, Knight R. Toward effective probiotics for autism and other

- 1 neurodevelopmental disorders. *Cell*. 2013 Dec 19;155(7):1446–8. PMID: PMC4166551
- 2 Golubeva AV, Joyce SA, Moloney G, Burokas A, Sherwin E, Arbolea S, et al. Microbiota-related Changes in Bile Acid  
3 & Tryptophan Metabolism are Associated with Gastrointestinal Dysfunction in a Mouse Model of Autism.  
4 *EBioMedicine*. 2017 Oct;24:166–78. PMID: PMC5652137
- 5 Gondalia SV, Palombo EA, Knowles SR, Cox SB, Meyer D, Austin DW. Molecular Characterisation of Gastrointestinal  
6 Microbiota of Children With Autism (With and Without Gastrointestinal Dysfunction) and Their Neurotypical  
7 Siblings. *Autism Res*. 2012 Dec 1;5(6):419–27.
- 8 Haas KN, Blanchard JL. *Kineothrix alysoides*, gen. nov., sp. nov., a saccharolytic butyrate-producer within the family  
9 Lachnospiraceae. *Int. J. Syst. Evol. Microbiol. Microbiology Society*; 2017 Feb;67(2):402–10.
- 0 Hall D, Huerta MF, McAuliffe MJ, Farber GK. Sharing heterogeneous data: the national database for autism research.  
1 *Neuroinformatics*. 2012 Oct;10(4):331–9. PMID: PMC4219200
- 2 Harris PA, Taylor R, Thielke R, Payne J, Gonzalez N, Conde JG. Research electronic data capture (REDCap)-A  
3 metadata-driven methodology and workflow process for providing translational research informatics support. *J*  
4 *Biomed Inform*. 2009 Apr;42(2):377–81. PMID: PMC2700030
- 5 Hong H, Gilbert E, Abowd GD, Arriaga RI. In-group Questions and Out-group Answers - Crowdsourcing Daily Living  
6 Advice for Individuals with Autism. CHI. 2015.
- 7 Hsiao EY, McBride SW, Hsien S, Sharon G, Hyde ER, McCue T, et al. Microbiota modulate behavioral and physiological  
8 abnormalities associated with neurodevelopmental disorders. *Cell*. 2013 Dec 19;155(7):1451–63. PMID:  
9 PMC3897394
- 0 Iwai S, Weinmaier T, Schmidt BL, Albertson DG, Poloso NJ, Dabbagh K, et al. Piphillin: Improved Prediction of  
1 Metagenomic Content by Direct Inference from Human Microbiomes. *PLoS ONE*. 2016;11(11):e0166104. PMID:  
2 PMC5098786
- 3 Jeong J-W, Morris MR, Teevan J, Liebling DJ. A Crowd-Powered Socially Embedded Search Engine. ICWSM. 2013.
- 4 Jiang Y, Qi H, Zhang XM. Co-biodegradation of anthracene and naphthalene by the bacterium *Acinetobacter johnsonii*. *J*  
5 *Environ Sci Health A Tox Hazard Subst Environ Eng*. 2018 Jan 4;7(386):1–9.
- 6 Kaakoush NO. Insights into the Role of Erysipelotrichaceae in the Human Host. *Front Cell Infect Microbiol*. 2015;5.
- 7 Kanehisa M, Furumichi M, Tanabe M, Sato Y, Morishima K. KEGG: new perspectives on genomes, pathways, diseases  
8 and drugs. *Nucleic Acids Research*. 2017 Jan 4;45(D1):D353–61. PMID: PMC5210567
- 9 Kanehisa M, Goto S. KEGG: kyoto encyclopedia of genes and genomes. *Nucleic Acids Research [Internet]*. 2000 Jan  
0 1;28(1):27–30. Retrieved from:  
1 <http://eutils.ncbi.nlm.nih.gov/entrez/eutils/eflink.fcgi?dbfrom=pubmed&id=10592173&retmode=ref&cmd=prlinks>.  
2 PMID: PMC102409
- 3 Kanehisa M, Sato Y, Kawashima M, Furumichi M, Tanabe M. KEGG as a reference resource for gene and protein  
4 annotation. *Nucleic Acids Research*. 2016 Jan 4;44(D1):D457–62. PMID: PMC4702792
- 5 Kang D-W, Adams JB, Gregory AC, Borody T, Chittick L, Fasano A, et al. Microbiota Transfer Therapy alters gut  
6 ecosystem and improves gastrointestinal and autism symptoms: an open-label study. *Microbiome*. *BioMed Central*;  
7 2017a;5(1). PMID: PMC5264285
- 8 Kang D-W, Ilhan ZE, Isern NG, Hoyt DW, Howsmon DP, Shaffer M, et al. Differences in fecal microbial metabolites and  
9 microbiota of children with autism spectrum disorders. *Anaerobe*. 2017b Dec 22;49:121–31.
- 0 Kang D-W, Park JG, Ilhan ZE, Wallstrom G, LaBaer J, Adams JB, et al. Reduced Incidence of *Prevotella* and Other  
1 Fermenters in Intestinal Microflora of Autistic Children. *PLoS ONE*. 2013;8(7). PMID: PMC3700858
- 2 Kosmicki JA, Sochat V, Duda M, Wall DP. Searching for a minimal set of behaviors for autism detection through feature  
3 selection-based machine learning. *Transl Psychiatry*. 2015;5:e514. PMID: PMC4445756
- 4 Krippendorff K. Reliability in Content Analysis: Some Common Misconceptions and Recommendations. *Human*  
5 *Communication Research*. 2004 Jul 1;30(3):411–33.
- 6 Krogus-Kurikka L, Kassinen A, Paulin L, Corander J, Mäkiyuokko H, Tuimala J, et al. Sequence analysis of percent  
7 G+C fraction libraries of human faecal bacterial DNA reveals a high number of Actinobacteria. *BMC Microbiol*.  
8 *BioMed Central*; 2009 Apr 8;9(1):68. PMID: PMC2679024
- 9 La Rosa PS, Brooks JP, Deych E, Boone EL, Edwards DJ, Wang Q, et al. Hypothesis testing and power calculations for  
0 taxonomic-based human microbiome data. *PLoS ONE*. *Public Library of Science*; 2012;7(12):e52078. PMID:  
1 PMC3527355

- 1 Lakshmi Priya MD, Geetha A. Level of trace elements (copper, zinc, magnesium and selenium) and toxic elements (lead  
2 and mercury) in the hair and nail of children with autism. *Biol Trace Elem Res.* 2011 Aug;142(2):148–58.
- 3 Langille MGI, Zaneveld J, Caporaso JG, McDonald D, Knights D, Reyes JA, et al. Predictive functional profiling of  
4 microbial communities using 16S rRNA marker gene sequences. *Nat. Biotechnol.* 2013 Sep;31(9):814–21. PMID:  
5 PMC3819121
- 6 Lau NM, Green PHR, Taylor AK, Hellberg D, Ajamian M, Tan CZ, et al. Markers of Celiac Disease and Gluten  
7 Sensitivity in Children with Autism. *PLoS ONE.* 2013;8(6):e66155. PMID: PMC3688832
- 8 Levy S, Duda M, Haber N, Wall DP. Sparsifying machine learning models identify stable subsets of predictive features  
9 for behavioral detection of autism. *Mol Autism.* BioMed Central; 2017;8(1):65. PMID: PMC5735531
- 0 Liu H, Wang J, He T, Becker S, Zhang G, Li D, et al. Butyrate: A Double-Edged Sword for Health? *Adv Nutr.* 2018 Jan  
1 1;9(1):21–9.
- 2 Lowe HJ, Ferris TA, Hernandez PM, Weber SC. STRIDE--An integrated standards-based translational research  
3 informatics platform. *AMIA Annu Symp Proc. American Medical Informatics Association;* 2009 Nov 14;2009:391–5.  
4 PMID: PMC2815452
- 5 Luo W, Friedman MS, Shedden K, Hankenson KD, Woolf PJ. GAGE: generally applicable gene set enrichment for  
6 pathway analysis. *BMC Bioinformatics.* 2009;10(1):161–17.
- 7 Macfabe D. Autism: metabolism, mitochondria, and the microbiome. *Glob Adv Health Med.* 2013 Nov;2(6):52–66.  
8 PMID: PMC3865378
- 9 Macfabe DF, Cain DP, Rodriguez-Capote K, Franklin AE, Hoffman JE, Boon F, et al. Neurobiological effects of  
0 intraventricular propionic acid in rats: possible role of short chain fatty acids on the pathogenesis and characteristics of  
1 autism spectrum disorders. *Behav. Brain Res.* 2007 Jan 10;176(1):149–69.
- 2 Magnusson KR, Hauck L, Jeffrey BM, Elias V, Humphrey A, Nath R, et al. Relationships between diet-related changes in  
3 the gut microbiome and cognitive flexibility. *Neuroscience.* 2015 Aug 6;300:128–40.
- 4 Malinen E, Krogus-Kurikka L, Lyra A, Nikkilä J, Jääskeläinen A, Rinttilä T, et al. Association of symptoms with  
5 gastrointestinal microbiota in irritable bowel syndrome. *World J. Gastroenterol.* Baishideng Publishing Group Inc;  
6 2010 Sep 28;16(36):4532–40. PMID: PMC2945484
- 7 McDonald D, Hyde ER, Debelius JW, Morton JT, González A, Ackermann G, et al. American Gut: an Open Platform for  
8 Citizen-Science Microbiome Research. *bioRxiv.* Cold Spring Harbor Laboratory; 2018 Mar 6;:1–80.
- 9 Messaoudi M, Violle N, Bisson J-F, Desor D, Javelot H, Rougeot C. Beneficial psychological effects of a probiotic  
0 formulation (*Lactobacillus helveticus* R0052 and *Bifidobacterium longum* R0175) in healthy human volunteers. *Gut*  
1 *Microbes.* 2011 Jul;2(4):256–61.
- 2 Midtvedt T. The gut: a triggering place for autism - possibilities and challenges. *Microb. Ecol. Health Dis.*  
3 2012;23(0):237. PMID: PMC3747739
- 4 Miller DC, Fung M, Carbo A. A Furry Friend's Dirty Mouth: Brain Abscess Due to *Aggregatibacter* (*Haemophilus*)  
5 *aphrophilus*. *Am. J. Med.* 2017 Oct;130(10):e447–8.
- 6 Montaña S, Schramm STJ, Traglia GM, Chiem K, Parmeciano Di Noto G, Almuzara M, et al. The Genetic Analysis of an  
7 *Acinetobacter johnsonii* Clinical Strain Evidenced the Presence of Horizontal Genetic Transfer. Hall R, editor. *PLoS*  
8 *ONE.* 2016;11(8):e0161528. PMID: PMC4993456
- 9 Mooney CZ. Monte Carlo Simulation. SAGE; 1997.
- 0 Moore SJ, Turnpenny P, Quinn A, Glover S, Lloyd DJ, Montgomery T, et al. A clinical study of 57 children with fetal  
1 anticonvulsant syndromes. *J. Med. Genet.* 2000 Jul;37(7):489–97. PMID: PMC1734633
- 2 Mudd AT, Berding K, Wang M, Donovan SM, Dilger RN. Serum cortisol mediates the relationship between fecal  
3 *Ruminococcus* and brain N-acetylaspartate in the young pig. *Gut Microbes.* Taylor & Francis; 2017 Nov 2;8(6):589–  
4 600. PMID: PMC5730385
- 5 Naka S, Yamana A, Nakano K, Okawa R, Fujita K, Kojima A, et al. Distribution of periodontopathic bacterial species in  
6 Japanese children with developmental disabilities. *BMC Oral Health.* BioMed Central; 2009 Sep 23;9(1):24. PMID:  
7 PMC2758840
- 8 Nichols FC, Housley WJ, O'Connor CA, Manning T, Wu S, Clark RB. Unique lipids from a common human bacterium  
9 represent a new class of Toll-like receptor 2 ligands capable of enhancing autoimmunity. *Am. J. Pathol.* 2009  
0 Dec;175(6):2430–8. PMID: PMC2789629
- 1 Nørskov-Lauritsen N. Classification, identification, and clinical significance of *Haemophilus* and *Aggregatibacter* species

- 1 with host specificity for humans. *Clin. Microbiol. Rev. American Society for Microbiology*; 2014 Apr;27(2):214–40.  
2 PMID: PMC3993099
- 3 Parada AE, Needham DM, Fuhrman JA. Every base matters: assessing small subunit rRNA primers for marine  
4 microbiomes with mock communities, time series and global field samples. *Environ. Microbiol. [Internet]*. 2015 Oct  
5 14;18(5):1403–14. Retrieved from:  
6 <http://eutils.ncbi.nlm.nih.gov/entrez/eutils/elink.fcgi?dbfrom=pubmed&id=26271760&retmode=ref&cmd=prlinks>
- 7 Parner ET, Baron-Cohen S, Lauritsen MB, Jørgensen M, Schieve LA, Yeargin-Allsopp M, et al. Parental age and autism  
8 spectrum disorders. *Ann Epidemiol.* 2012 Mar;22(3):143–50.
- 9 Parracho H, Bingham MO, Gibson GR, McCartney AL. Differences between the gut microflora of children with autistic  
0 spectrum disorders and that of healthy children. *J. Med. Microbiol.* 2005 Oct;54(10):987–91.
- 1 Paulson JN, Stine OC, Bravo HC, Pop M. Differential abundance analysis for microbial marker-gene surveys. *Nat.*  
2 *Methods. BioMed Central*; 2013 Sep 29;10(12):1200–2.
- 3 SAITOU N, NEI M. The Neighbor-Joining Method - a New Method for Reconstructing Phylogenetic Trees. *Mol. Biol.*  
4 *Evol.* 1987 Jul;4(4):406–25.
- 5 Sandler RH, Finegold SM, Bolte ER, Buchanan CP, Maxwell AP, Väisänen ML, et al. Short-term benefit from oral  
6 vancomycin treatment of regressive-onset autism. *J. Child Neurol.* 5 ed. 2000 Jul;15(7):429–35.
- 7 Schliep KP. phangorn: phylogenetic analysis in R. *Bioinformatics.* 2011;27(4):592–3. PMID: PMC3035803
- 8 Shaw W. Increased urinary excretion of a 3-(3-hydroxyphenyl)-3-hydroxypropionic acid (HPHPA), an abnormal  
9 phenylalanine metabolite of *Clostridia* spp. in the gastrointestinal tract, in urine samples from patients with autism and  
10 schizophrenia. *Nutr Neurosci.* 10 ed. Taylor & Francis; 2010 Jun;13(3):135–43.
- 1 Song Y, Liu C, Finegold SM. Real-time PCR quantitation of clostridia in feces of autistic children. *Appl. Environ.*  
2 *Microbiol.* 2004 Nov;70(11):6459–65. PMID: PMC525120
- 3 Spooner R, Weigel KM, Harrison PL, Lee K, Cangelosi GA, Yilmaz Ö. In Situ Anabolic Activity of Periodontal  
4 Pathogens *Porphyromonas gingivalis* and *Filifactor alocis* in Chronic Periodontitis. *Sci Rep. Nature Publishing Group*;  
5 2016 Sep 19;6(1):33638. PMID: PMC5027532
- 6 Spor A, Koren O, Ley R. Unravelling the effects of the environment and host genotype on the gut microbiome. *Nat. Rev.*  
7 *Microbiol. Nature Publishing Group*; 2011 Apr 1;9(4):279–90.
- 8 Subramanian A, Tamayo P, Mootha VK, Mukherjee S, Ebert BL, Gillette MA, et al. Gene set enrichment analysis: a  
9 knowledge-based approach for interpreting genome-wide expression profiles. *Proc. Natl. Acad. Sci. U.S.A.* 2005 Oct  
0 25;102(43):15545–50. PMID: PMC1239896
- 1 Swan M. Crowdsourced health research studies: an important emerging complement to clinical trials in the public health  
2 research ecosystem. *J Med Internet Res [Internet]*. 2012 Mar 7;14(2):e46. Retrieved from:  
3 <http://eutils.ncbi.nlm.nih.gov/entrez/eutils/elink.fcgi?dbfrom=pubmed&id=22397809&retmode=ref&cmd=prlinks>.  
4 PMID: PMC3376509
- 5 Van Veen HW, Abee T, Kleefsman AW, Melgers B, Kortstee GJ, Konings WN, et al. Energetics of alanine, lysine, and  
6 proline transport in cytoplasmic membranes of the polyphosphate-accumulating *Acinetobacter johnsonii* strain 210A.  
7 *J. Bacteriol. American Society for Microbiology (ASM)*; 1994 May;176(9):2670–6. PMID: PMC205407
- 8 Vital M, Howe AC, Tiedje JM. Revealing the bacterial butyrate synthesis pathways by analyzing (meta)genomic data.  
9 *MBio.* 2014 Apr 22;5(2):e00889–e00889–14. PMID: PMC3994512
- 0 Vuong HE, Hsiao EY. Emerging Roles for the Gut Microbiome in Autism Spectrum Disorder. *Biol. Psychiatry.*  
1 2017;81(5):411–23. PMID: PMC5285286
- 2 Wald A. Tests of Statistical Hypotheses Concerning Several Parameters When the Number of Observations is Large.  
3 *Transactions of the American Mathematical Society.* 1943 Nov;54(3):426–82.
- 4 Wall DP, Kosmicki J, Deluca TF, Harstad E, Fusaro VA. Use of machine learning to shorten observation-based screening  
5 and diagnosis of autism. *Transl Psychiatry.* 2012;2:e100. PMID: PMC3337074
- 6 Walters WA, Hyde ER, Berg-Lyons D, Ackermann GL, Humphrey G, Parada A, et al. Improved Bacterial 16S rRNA  
7 Gene (V4 and V4-5) and Fungal Internal Transcribed Spacer Marker Gene Primers for Microbial Community Surveys.  
8 *American Society for Microbiology mSystem.* 2015 Dec 16;1(1):1–10.
- 9 Wang L, Christophersen CT, Sorich MJ, Gerber JP, Angley MT, Conlon MA. Low Relative Abundances of the Mucolytic  
0 Bacterium *Akkermansia muciniphila* and *Bifidobacterium* spp. in Feces of Children with Autism. *Appl. Environ.*  
1 *Microbiol. American Society for Microbiology*; 2011 Sep;77(18):6718–21. PMID: PMC3187122



- 1 Wang L, Christophersen CT, Sorich MJ, Gerber JP, Angley MT, Conlon MA. Elevated Fecal Short Chain Fatty Acid and  
2 Ammonia Concentrations in Children with Autism Spectrum Disorder. *Dig. Dis. Sci.* 2012 Aug;57(8):2096–102.
- 3 Wang L, Christophersen CT, Sorich MJ, Gerber JP, Angley MT, Conlon MA. Increased abundance of *Sutterella* spp. and  
4 *Ruminococcus torques* in feces of children with autism spectrum disorder. *Mol Autism.* BioMed Central; 2013 Nov  
5 4;4(1):42. PMID: PMC3828002
- 6 Wang Q, Garrity GM, Tiedje JM, Cole JR. Naive Bayesian classifier for rapid assignment of rRNA sequences into the  
7 new bacterial taxonomy. *Appl. Environ. Microbiol.* 2007 Aug;73(16):5261–7. PMID: PMC1950982
- 8 Wang Y, Kasper LH. The role of microbiome in central nervous system disorders. *Brain Behav. Immun.* 2014 May;38:1–  
9 12.
- 0 Wilcoxon F, Katti SK, Wilcox RA. Critical Values and Probability Levels for the Wilcoxon Rank Sum Test and the  
1 Wilcoxon Signed Rank Test. 1963.
- 2 Williams BL, Hornig M, Buie T, Bauman ML, Paik MC, Wick I, et al. Impaired Carbohydrate Digestion and Transport  
3 and Mucosal Dysbiosis in the Intestines of Children with Autism and Gastrointestinal Disturbances. *PLoS ONE.*  
4 2011;6(9). PMID: PMC3174969
- 5 Yap IKS, Angley M, Veselkov KA, Holmes E, Lindon JC, Nicholson JK. Urinary Metabolic Phenotyping Differentiates  
6 Children with Autism from Their Unaffected Siblings and Age-Matched Controls. *J. Proteome Res.* American  
7 Chemical Society; 2010 Jun;9(6):2996–3004.
- 8 YIP M, KNOX WE. Glutamine-Dependent Carbamyl Phosphate Synthetase - Properties and Distribution in Normal and  
9 Neoplastic Rat Tissues. *J. Biol. Chem.* 1970;245(9):2199–&.
- 0 Yoon S-H, Ha S-M, Kwon S, Lim J, Kim Y, Seo H, et al. Introducing EzBioCloud: a taxonomically united database of  
1 16S rRNA gene sequences and whole-genome assemblies. *Int. J. Syst. Evol. Microbiol.* 2017 May;67(5):1613–7.  
2 PMID: PMC5563544
- 3 Ze X, Duncan SH, Louis P, Flint HJ. *Ruminococcus bromii* is a keystone species for the degradation of resistant starch in  
4 the human colon. *ISME J.* Nature Publishing Group; 2012 Aug;6(8):1535–43. PMID: PMC3400402  
5  
6

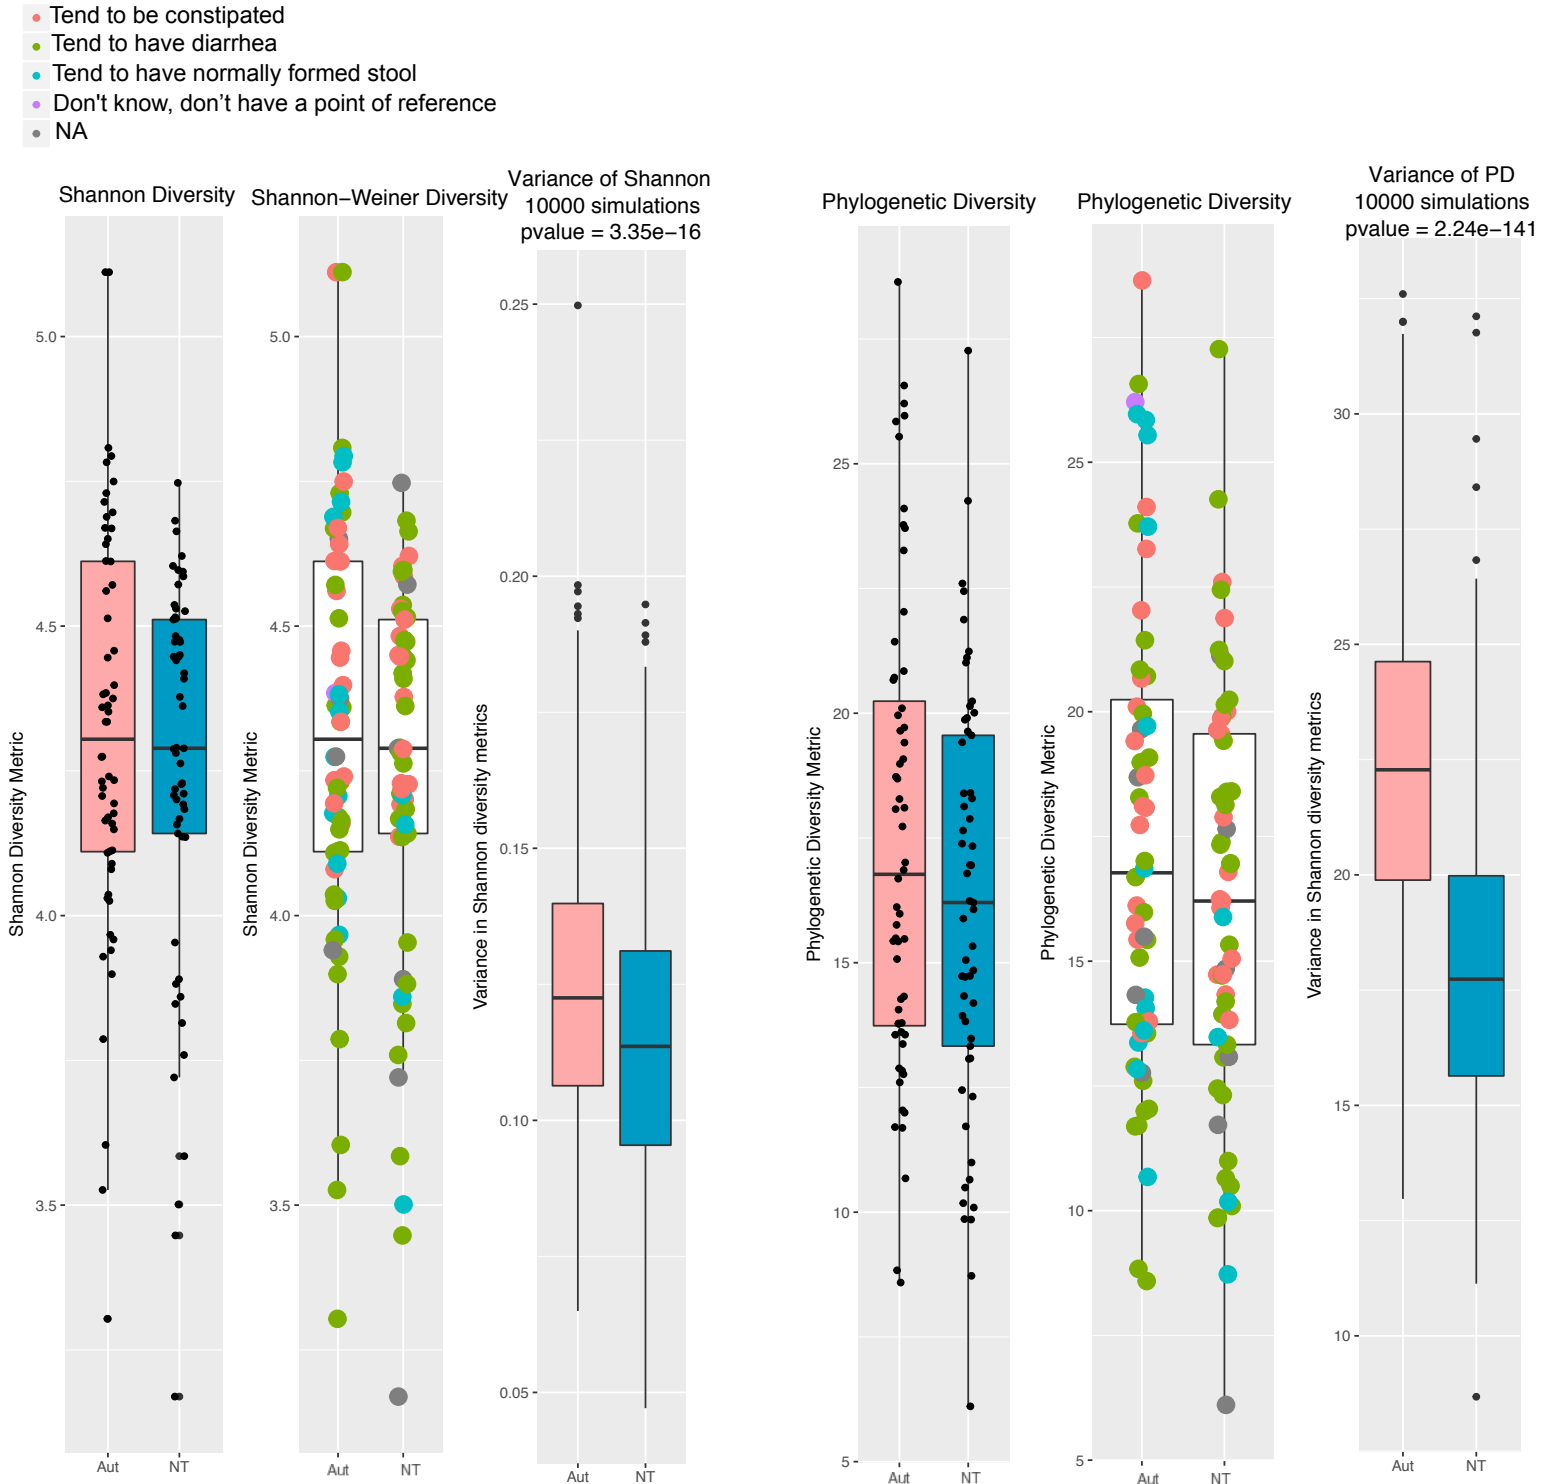

**Figure 1: Phylogenetic Diversity and Shannon Diversity used as estimators of microbial alpha-diversity**

The variance of diversity (distribution of scores) in the ASD cohort was significantly greater than the NT cohort (bootstrap  $p < .001$ ) with both Diversity Estimator. Shannon diversity was also significantly related to bowel movement quality (fisher-exact  $p = .02$ ), with low diversity associated with diarrhea, but not significantly related to bowel movement frequency (fisher-exact  $p = .17$ ).

**Table 1: Clinical Characteristics for ASD and NT Participants with significant difference between the cohorts.**

|                                                                               | ASD(n=60) | %     | NT(n=57) | %     | Adjusted p-value   |
|-------------------------------------------------------------------------------|-----------|-------|----------|-------|--------------------|
| <b>Gender<sup>1</sup></b>                                                     |           |       |          |       |                    |
| Male                                                                          | 43/60     | 71.7% | 27/49    | 55.1% | 2.3e <sup>-2</sup> |
| Female                                                                        | 17/60     | 28.3% | 22/49    | 44.9% |                    |
| <b>Gluten Intolerance<sup>2</sup></b>                                         |           |       |          |       |                    |
| Yes                                                                           | 22/59     | 34.4% | 1/56     | 1.8%  | 3.5e <sup>-4</sup> |
| No                                                                            | 42/59     | 71.2% | 55/56    | 98.2% |                    |
| <b>Nutritional/herbal supplement<sup>3</sup></b>                              |           |       |          |       |                    |
| Yes                                                                           | 35/55     | 63.6% | 18/51    | 35.3% | 2.3e <sup>-2</sup> |
| No                                                                            | 20/55     | 36.4% | 33/51    | 64.7% |                    |
| <b>Special Diet Restrictions<sup>4</sup></b>                                  |           |       |          |       |                    |
| Yes                                                                           | 20/54     | 37.0% | 6/51     | 11.8% | 2.3e <sup>-2</sup> |
| No                                                                            | 34/54     | 63.0% | 45/51    | 88.2% |                    |
| <b>Dairy Intolerance</b>                                                      |           |       |          |       |                    |
| Yes                                                                           | 16/60     | 26.7% | 1/57     | 1.8%  | 2.6 <sup>-6</sup>  |
| No                                                                            | 44/60     | 73.3% | 56/57    | 98.2% |                    |
| <b>Consumption of at least 2 servings of milk or cheese a day<sup>6</sup></b> |           |       |          |       |                    |
| Never                                                                         | 23/54     | 42.6% | 6/50     | 12.0% | 2.3 <sup>-3</sup>  |
| Rarely(a few times a month)                                                   | 8/54      | 14.8% | 2/50     | 4.0%  |                    |
| Occasionally(1-2/week)                                                        | 5/54      | 9.3%  | 6/50     | 12.0% |                    |
| Regularly(3-5/week)                                                           | 7/54      | 12.9% | 18/50    | 36.0% |                    |
| Daily                                                                         | 11/54     | 20.4% | 18/50    | 36.0% |                    |

<sup>1</sup> missing 8 NT gender responses

<sup>2</sup> missing 1 NT and 1 ASD responses

<sup>3</sup> missing 6 NT and 5 ASD

<sup>4</sup> missing 6 NT and 6 ASD

<sup>6</sup> missing 7 NT and 6 ASD

|                                   | ESV   | Phylum         | Class               | Order                     | Family                     | Genus                   | Species          | Analysis | pvals_adj | IMG genome perfect alignment (number of hits)                                                                                                                          |
|-----------------------------------|-------|----------------|---------------------|---------------------------|----------------------------|-------------------------|------------------|----------|-----------|------------------------------------------------------------------------------------------------------------------------------------------------------------------------|
| ASD CANDIDATE BIOMARKERS          | ESV1  | Bacteroidetes  | Bacteroidia         | Bacteroidales             | <i>Bacteroidaceae</i>      | <i>Bacteroides</i>      |                  | DEseq2   | 2.34E-14  | <i>Bacteroides vulgatus</i>                                                                                                                                            |
|                                   | ESV2  | Firmicutes     | Clostridia          | Clostridiales             |                            |                         |                  | Pair     | 8.92E-03  | -                                                                                                                                                                      |
|                                   | ESV3  | Firmicutes     | Clostridia          | Clostridiales             | <i>Ruminococcaceae</i>     |                         |                  | Pair     | 8.92E-03  | -                                                                                                                                                                      |
|                                   | ESV4  | Firmicutes     | Clostridia          | Clostridiales             | <i>Ruminococcaceae</i>     | <i>Oscillospira</i>     |                  | Pair     | 8.92E-03  | -                                                                                                                                                                      |
|                                   | ESV5  | Firmicutes     | Clostridia          | Clostridiales             | <i>Tissierellaceae</i>     | <i>Anaerococcus</i>     |                  | Pair     | 8.92E-03  | <i>Anaerococcus senegalensis</i>                                                                                                                                       |
|                                   | ESV6  | Proteobacteria | Gammaproteobacteria | Pasteurellales            | <i>Pasteurellaceae</i>     | <i>Aggregatibacter</i>  |                  | Pair     | 8.92E-03  | <i>Haemophilus pittmaniae</i> , <i>Aggregatibacter</i>                                                                                                                 |
|                                   | ESV7  | Firmicutes     | Clostridia          | Clostridiales             | <i>Ruminococcaceae</i>     | <i>Ruminococcus</i>     |                  | ZIG      | 1.09E-05  | -                                                                                                                                                                      |
|                                   | ESV8  | Bacteroidetes  | Bacteroidia         | Bacteroidales             | <i>Bacteroidaceae</i>      | <i>Bacteroides</i>      | <i>uniformis</i> | ZIG      | 4.88E-04  | <i>Bacteroides uniformis</i> (6), <i>Bacteroides</i> sp. 4_1_36 (1)                                                                                                    |
|                                   | ESV9  | Firmicutes     | Erysipelotrichi     | <i>Erysipelotrichales</i> | <i>Erysipelotrichaceae</i> | <i>Holdemania</i>       |                  | ZIG      | 2.20E-02  | <i>Holdemania filiformis</i>                                                                                                                                           |
|                                   | ESV10 | Firmicutes     | Clostridia          | Clostridiales             | <i>Clostridiaceae</i>      | <i>Clostridium</i>      | <i>celatum</i>   | ZIG      | 2.70E-02  | <i>Clostridium saudiense</i> <sup>1*</sup>                                                                                                                             |
| NEUROTYPICAL CANDIDATE BIOMARKERS | ESV11 | Firmicutes     | Clostridia          | Clostridiales             | <i>Lachnospiraceae</i>     | [ <i>Clostridium</i> ]  | <i>colinum</i>   | Pair     | 8.92E-03  | -                                                                                                                                                                      |
|                                   | ESV12 | Bacteroidetes  | Bacteroidia         | Bacteroidales             | <i>Porphyromonadaceae</i>  | <i>Porphyromonas</i>    |                  | Pair     | 8.92E-03  | -                                                                                                                                                                      |
|                                   | ESV13 | Actinobacteria | Coriobacteriia      | <i>Coriobacteriales</i>   | <i>Coriobacteriaceae</i>   | <i>Slackia</i>          |                  | Pair     | 8.92E-03  | <i>Slackia piriformis</i>                                                                                                                                              |
|                                   | ESV14 | Proteobacteria | Deltaproteobacteria | <i>Desulfovibrionales</i> | <i>Desulfovibrionaceae</i> | <i>Desulfovibrio</i>    |                  | Pair     | 8.92E-03  | <i>Desulfovibrio fairfieldensis</i> (3), <i>Desulfovibrio</i> sp. 3_1_syn3 (3), <i>Desulfovibrio</i> sp. 6_1_46AFAA (1)                                                |
|                                   | ESV15 | Proteobacteria | Gammaproteobacteria | <i>Pseudomonadales</i>    | <i>Moraxellaceae</i>       | <i>Acinetobacter</i>    | <i>johnsonii</i> | Pair     | 8.92E-03  | <i>Acinetobacter johnsonii</i> (18), <i>Acinetobacter johnsonii</i> (4), <i>Acinetobacter schindleri</i>                                                               |
|                                   | ESV16 | Firmicutes     | Clostridia          | Clostridiales             | <i>Lachnospiraceae</i>     | <i>Lachnospira</i>      |                  | ZIG      | 2.12E-03  | <i>Eubacterium eligens</i> <sup>2*</sup>                                                                                                                               |
|                                   | ESV17 | Firmicutes     | Clostridia          | Clostridiales             | <i>Lachnospiraceae</i>     |                         |                  | ZIG      | 9.73E-03  | -                                                                                                                                                                      |
|                                   | ESV18 | Firmicutes     | Clostridia          | Clostridiales             | <i>Lachnospiraceae</i>     |                         |                  | ZIG      | 3.52E-03  | -                                                                                                                                                                      |
|                                   | ESV19 | Firmicutes     | Clostridia          | Clostridiales             | <i>Lachnospiraceae</i>     | [ <i>Ruminococcus</i> ] |                  | ZIG      | 1.64E-02  | <i>Ruminococcaceae</i> bacterium GD1 (2), <i>Ruminococcus</i> sp. DSM 100440 (1), <i>Clostridiales</i> bacterium VE202-14 (1), <i>Sellimonas intestinalis</i> BR72 (1) |
|                                   | ESV20 | Firmicutes     | Clostridia          | Clostridiales             | <i>Lachnospiraceae</i>     | <i>Coprococcus</i>      | <i>catus</i>     | ZIG      | 3.00E-02  | <i>Coprococcus catus</i>                                                                                                                                               |
|                                   | ESV21 | Actinobacteria | Actinobacteria      | <i>Bifidobacteriales</i>  | <i>Bifidobacteriaceae</i>  | <i>Bifidobacterium</i>  |                  | ZIG      | 4.87E-02  | <i>Bifidobacterium pseudocatenulatum</i> (9), <i>Bifidobacterium catenulatum</i> (6), <i>Bifidobacterium gallicum</i> (4), <i>Bifidobacterium</i>                      |

ESVs with taxa specific to the ASD cohort

ESVs with taxa specific to the NT cohort

<sup>1\*</sup> *Clostridium celatum* being the second hit with 232/233 pb

<sup>2\*</sup> *Lachnospira* first hit 221/233

**Table 2: Candidate 16S biomarkers enriched and depleted in the autism cohort and their annotation**

This table indicates the Exact Sequence Variants (ESVs) identified using 3 analysis methods: Permutation Test on Sibling Pair Differentials (Pair), Differential Ribosomal Analysis Based on the Negative Binomial Distribution (Deseq2), and Zero Inflated Gaussian Analysis (ZIG). The annotation was performed using Ribosomal Database Project's naive Bayesian classifier with GreenGenes database 13.8. A blast was also performed using IMG's most recent database (January 2018), and the perfect match (100% similarity on full length of the query) is indicated in the last column.

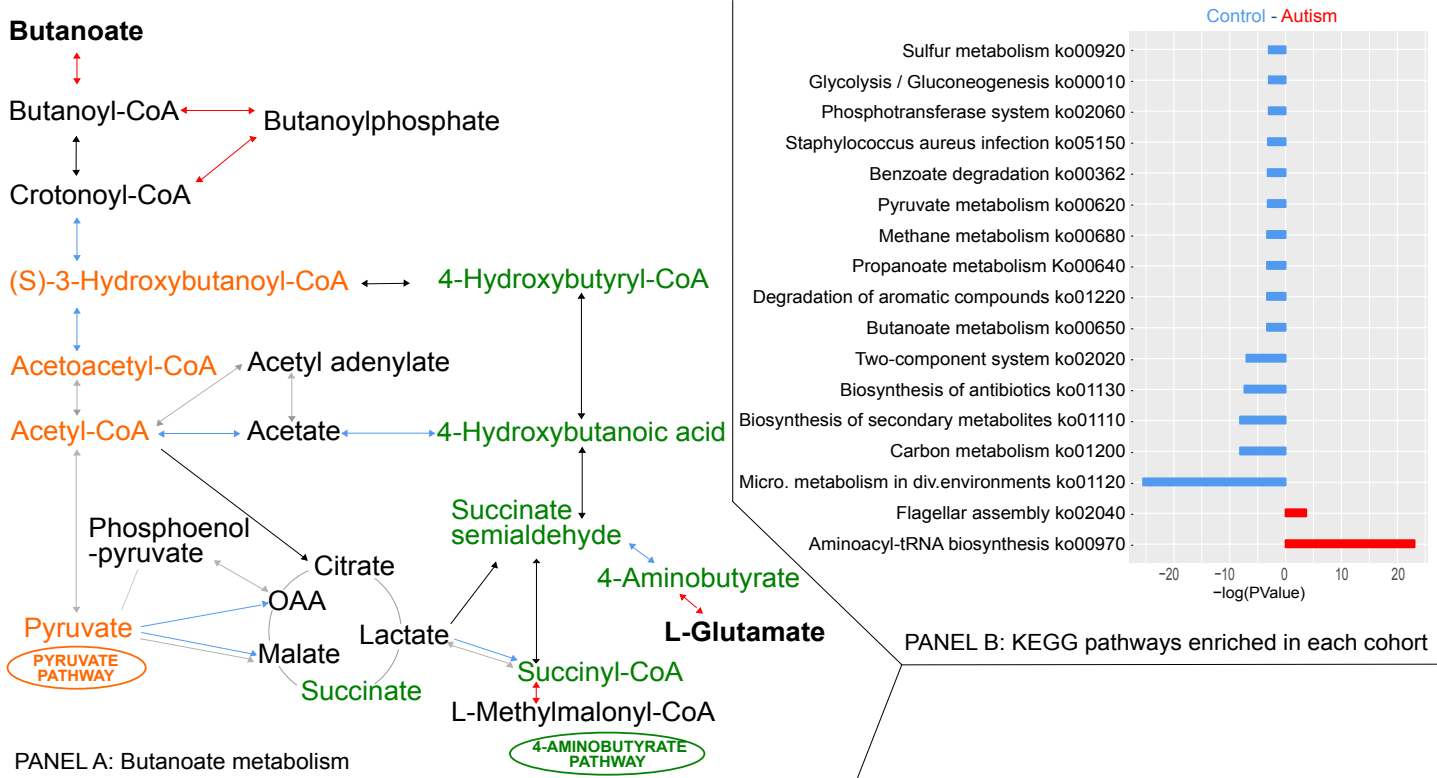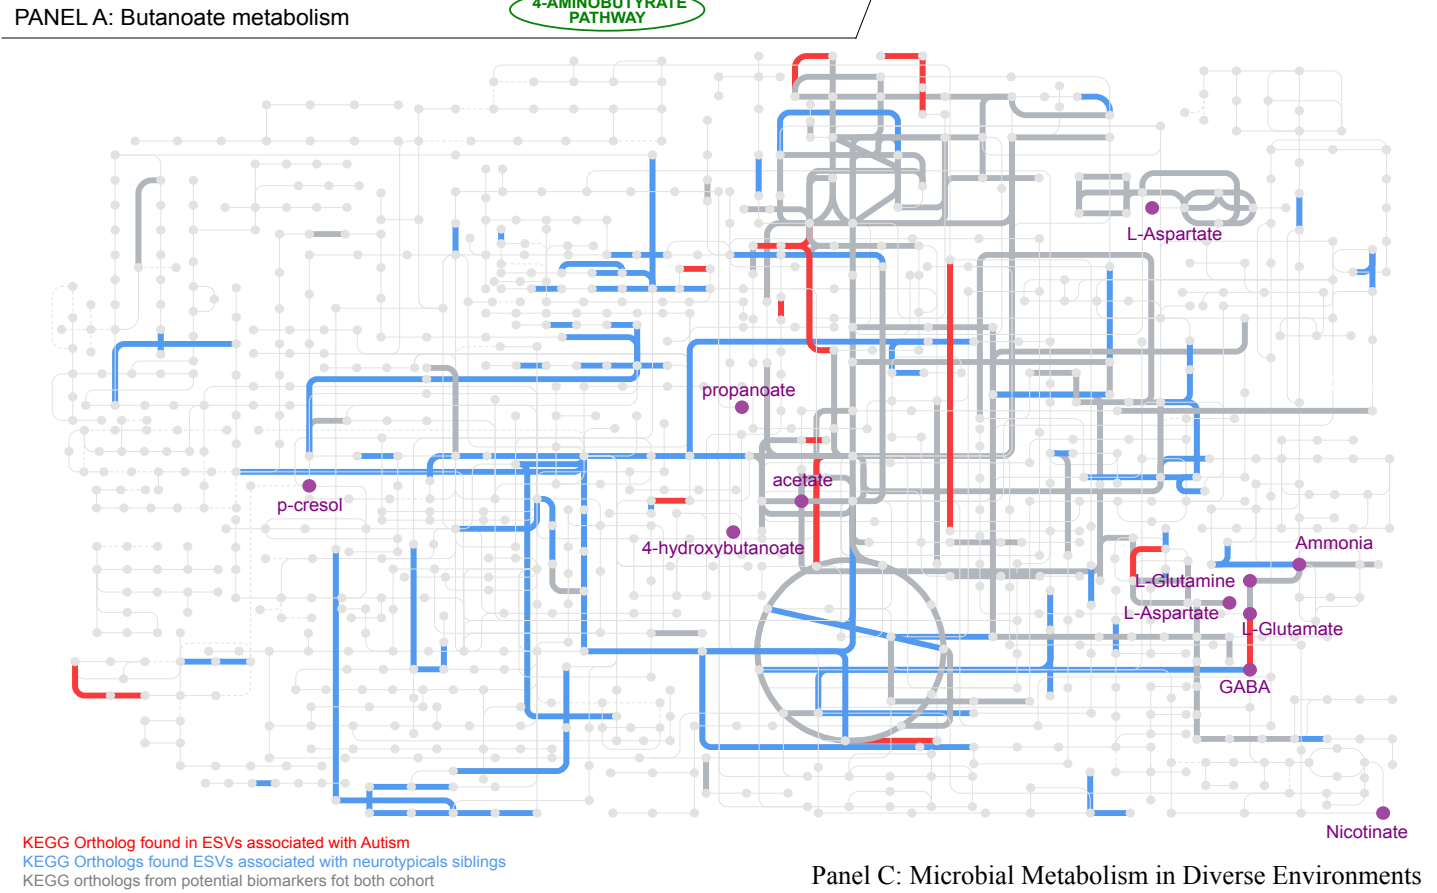

**FIGURE 2: Pathway analyses derived from Exact Sequence Variants Analysis**

**Panel A: Butanoate metabolism:** Detailed analysis of the butanoate pathway, the color of the arrow reflecting the cohort in which the ESV carrying the KEGG ortholog was detected

**Panel B: KEGG pathways enriched in each cohort:** List of the 17 pathways enriched in the Gene Set Enrichment Analysis using genomes and abundances estimate from the ribosomal analysis

**Panel C: Microbial Metabolism in Diverse Environments:** Detailed analysis of the pathway microbial metabolism in diverse environments and metabolites of interest for the gut-brain axis interaction.

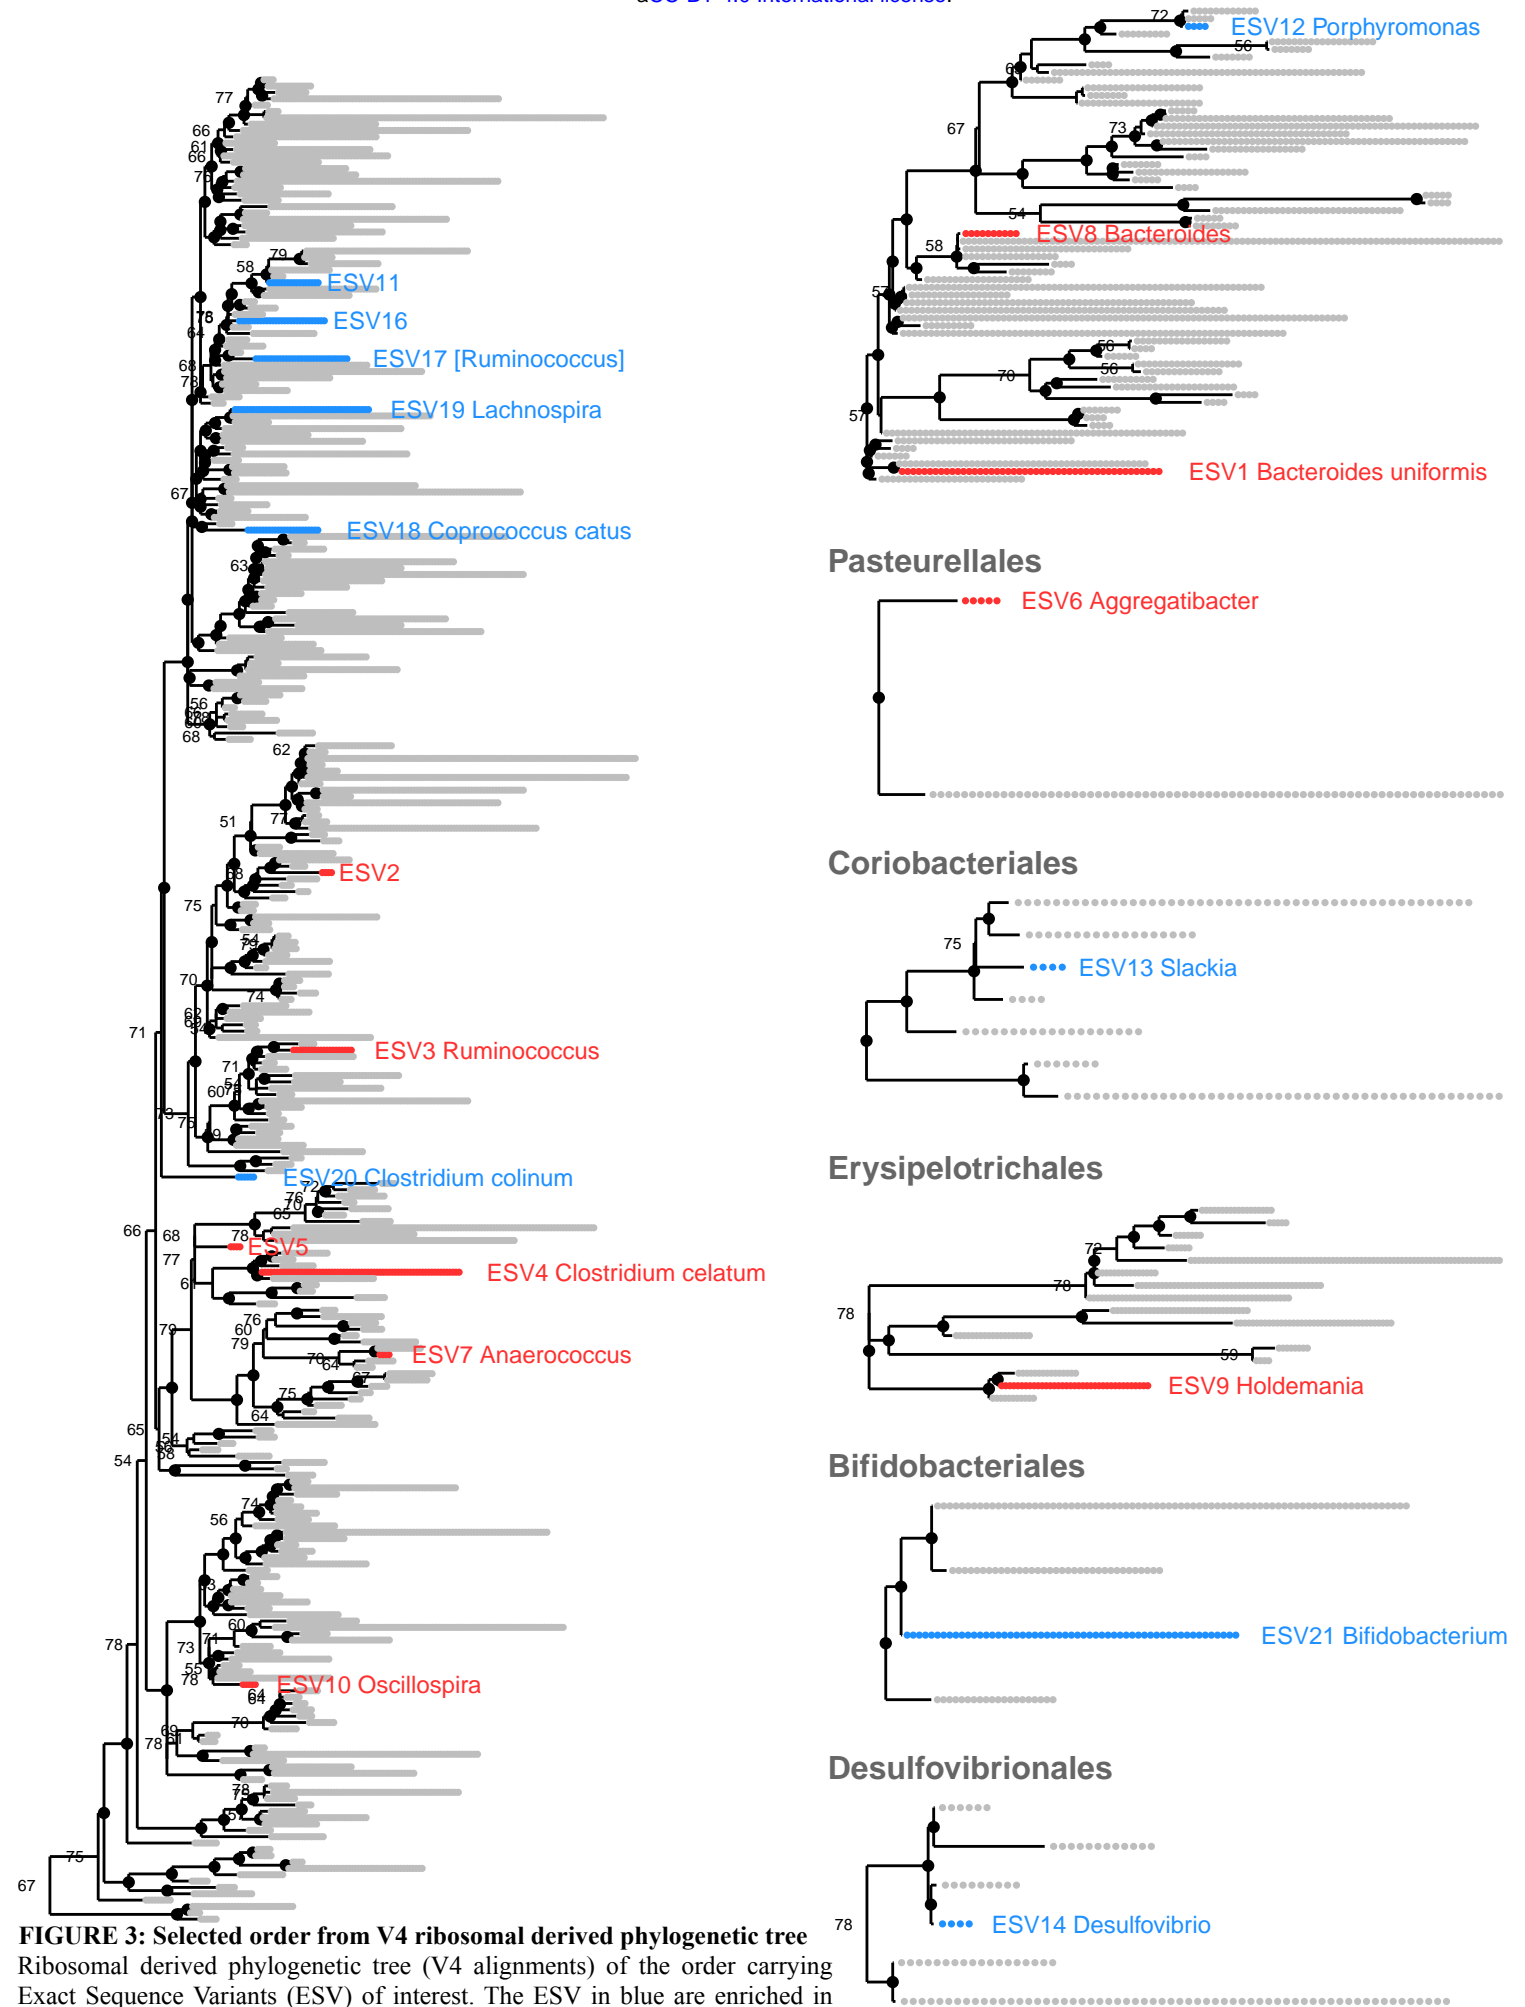

**FIGURE 3: Selected order from V4 ribosomal derived phylogenetic tree**  
 Ribosomal derived phylogenetic tree (V4 alignments) of the order carrying Exact Sequence Variants (ESV) of interest. The ESV in blue are enriched in Neurotypical cohort and the ones in red in the Autism cohort.

**Table 3: Taxa Enriched in the ASD Cohort:**

| Phylogeny                                                                                          | Commensal Activity & Potential Relevance to ASD                                                                                                                                                                                                                                                                                                                                                                                                                                                                                                                                                                                                                                                                                                                                                                                                                                                                                                                                                                                                                                                                                                                                                                                                                                                                                                                          |
|----------------------------------------------------------------------------------------------------|--------------------------------------------------------------------------------------------------------------------------------------------------------------------------------------------------------------------------------------------------------------------------------------------------------------------------------------------------------------------------------------------------------------------------------------------------------------------------------------------------------------------------------------------------------------------------------------------------------------------------------------------------------------------------------------------------------------------------------------------------------------------------------------------------------------------------------------------------------------------------------------------------------------------------------------------------------------------------------------------------------------------------------------------------------------------------------------------------------------------------------------------------------------------------------------------------------------------------------------------------------------------------------------------------------------------------------------------------------------------------|
| Family: <i>Clostridiaceae</i><br>ESV 10: <i>Clostridium celatum</i>                                | <ul style="list-style-type: none"> <li>- Belongs to Clostridial cluster IV</li> <li>- Enrichment in ASD cohort: <i>Clostridium</i> genus (Finegold et al., 2002; 2010), <i>Clostridium histolyticum</i> (Parracho et al., 2005), <i>Clostridium bolteae</i> in ASD (Song et al., 2004).</li> <li>- Clostridia and Bacteroides classes drive differences between ASD and NT in mouse guts (Hsiao et al., 2013).</li> <li>- Depletion of <i>Clostridium leptum</i> in ASD (Finegold et al., 2010).</li> <li>- Correlated with high-fat diets and subsequently cognitive inflexibility (Magnusson et al., 2015).</li> <li>- Produce m-tyrosine which has been shown to decrease neural catecholamine concentration levels and induce ASD typified behavioral abnormalities in animal models (Shaw, 2010).</li> <li>- Antibiotic vancomycin can be used to target the <i>Clostridium</i> species to provide short term alleviation of ASD symptoms (Sandler et al., 2000).</li> <li>- Increased <i>Clostridiales</i> correlated with shorter gap between GI symptoms and time of onset of ASD symptoms (Williams et al., 2011).</li> <li>- Clostridia produce both an enterotoxin and a neurotoxin and are generally very active metabolically. They may produce toxic substances like phenols, p-cresol, and various indole derivatives (Finegold et al., 2002).</li> </ul> |
| Genus: <i>Bacteroides</i><br>ESV1, ESV8                                                            | <ul style="list-style-type: none"> <li>- Largest portion of the gut microbiome and helps digest vegetables and whole-grain, produce butyrate and ferment glycans</li> <li>- Responsible for biotransformation of bile acids, which in turn are associated with GI dysfunction in mouse (Golubeva et al., 2017).</li> <li>- <i>Bacteroides vulgatus</i> found enriched ASD (Finegold et al., 2010).</li> <li>- Increased levels of the bacteria <i>Bacteroides vulgatus</i> lead to increased brain levels of propionic acid, known to cause symptoms characteristic of autism when injected into the brain of rats (Macfabe et al., 2007) (Downs et al., 2014).</li> <li>- <i>in situ</i> hybridization targeting <i>Bacteroides</i> found no association with ASD (Parracho et al., 2005).</li> </ul>                                                                                                                                                                                                                                                                                                                                                                                                                                                                                                                                                                   |
| Family: <i>Ruminococcaceae</i><br>ESV3 & ESV4: <i>Ruminococcus</i>                                 | <ul style="list-style-type: none"> <li>- Aids in digestion of resistant starches, belongs to Clostridial cluster IV and produces butyrate</li> <li>- Helps reverse infectious diarrhea by slowly digesting resistant starches (Ze et al., 2012).</li> </ul>                                                                                                                                                                                                                                                                                                                                                                                                                                                                                                                                                                                                                                                                                                                                                                                                                                                                                                                                                                                                                                                                                                              |
| ESV7: <i>Oscillospira</i>                                                                          | <ul style="list-style-type: none"> <li>- <i>Ruminococcus torques</i> associated with increased severity of Irritable Bowel Syndrome (Malinen et al., 2010) and enriched in ASD (Wang et al., 2013).</li> <li>- <i>Ruminococcus</i> potentially predictive fecal biomarkers for dysregulation of central brain neurometabolite N-acetylaspartate mediated through serum cortisol in young pigs (Mudd et al., 2017). Same neurometabolite reported altered in ASD (Friedman et al., 2003).</li> <li>- <i>Oscillospira</i> aids in the breakdown of complex carbohydrates by fermenting resistant starches, and produces butyrate</li> </ul>                                                                                                                                                                                                                                                                                                                                                                                                                                                                                                                                                                                                                                                                                                                                |
| Family: <i>Erysipelotrichaceae</i><br>ESV9: <i>Holdemania</i>                                      | <ul style="list-style-type: none"> <li>- Family commonly found in gut microbiome of mice on high-fat diet (Kaakoush, 2015), which itself is often associated with neurobehavioral change (Bruce-Keller et al., 2015).</li> <li>- Erysipelotrichaceae <i>Tuicibacter sanguinis</i> found enriched in ASD (DeAngelis et al., 2013).</li> <li>- Entire Erysipelotrichaceae family also found depleted in ASD in mice (Gilbert et al., 2013)</li> </ul>                                                                                                                                                                                                                                                                                                                                                                                                                                                                                                                                                                                                                                                                                                                                                                                                                                                                                                                      |
| Family: <i>Pasteurellales</i><br>ESV6: <i>Aggregatibacter</i> /<br><i>Haemophilus pittmaniae</i> * | <ul style="list-style-type: none"> <li>- Periodontopathic species (Nørskov-Lauritsen, 2014).</li> <li>- Demonstrate opportunistic pathogenicity, including brain abscess (Miller et al., 2017).</li> <li>- <i>Aggregatibacter</i> was detected as one of the most abundant bacterial genera in children with developmental disabilities in Japan (Naka et al., 2009).</li> <li>- <i>Aggregatibacter</i> depleted in ASD (Kang et al., 2017a)</li> </ul>                                                                                                                                                                                                                                                                                                                                                                                                                                                                                                                                                                                                                                                                                                                                                                                                                                                                                                                  |
| Family: <i>Tissierellaceae</i><br>ESV5: <i>Anaerococcus</i>                                        | <ul style="list-style-type: none"> <li>- Isolated for infectious sites and bacterial abscesses, indicating potential virulence (Ezaki et al., 2001).</li> </ul>                                                                                                                                                                                                                                                                                                                                                                                                                                                                                                                                                                                                                                                                                                                                                                                                                                                                                                                                                                                                                                                                                                                                                                                                          |

\* Discrepancy in annotation. RDP classifier using GreenGenes 13.8 (last updated 2013) assigned *Aggregatibacter Unknown*, while IMG database (updated continuously) assigned *Haemophilus pittmaniae*. Both genera are strongly related to each other, and the new genus *Aggregatibacter* was created to accommodate some former *Haemophilus* and *Actinobacillus* species.

**Table 4: Taxa Enriched in the Neurotypical Cohort:**

| Phylogeny                                                                                                                                     | Commensal Activity & Potential Relevance to ASD                                                                                                                                                                                                                                                                                                                                                                                                                                                                                                                                                                                                                                                                                 |
|-----------------------------------------------------------------------------------------------------------------------------------------------|---------------------------------------------------------------------------------------------------------------------------------------------------------------------------------------------------------------------------------------------------------------------------------------------------------------------------------------------------------------------------------------------------------------------------------------------------------------------------------------------------------------------------------------------------------------------------------------------------------------------------------------------------------------------------------------------------------------------------------|
| Family: <i>Lachnospiraceae</i><br>ESV17 & ESV18<br>ESV16: <i>Lachnospira</i><br>ESV20: <i>Coprococcus catus</i><br>ESV19: <i>Ruminococcus</i> | <ul style="list-style-type: none"> <li>- Member of Clostridium cluster XIV (Yoon et al., 2017).</li> <li>- Help digest fiber and produces butyrate (Haas and Blanchard, 2017).</li> <li>- Family shown depleted in inflammatory bowel disorder (Frank et al., 2007).</li> <li>- Genus <i>Coprococcus</i> found depleted in ASD (Kang et al., 2013; 2017b)</li> <li>- Plethora of <i>Lachnospiraceae</i> depletion in ASD suggests lack of bacterial taxa important for carbohydrate degradation (Vuong and Hsiao, 2017).</li> </ul>                                                                                                                                                                                             |
| Family: <i>Desulfovibrionaceae</i><br>ESV14: <i>Desulfovibrio</i>                                                                             | <ul style="list-style-type: none"> <li>- <i>Desulfovibrio</i> genus potentially key influential organisms in ASD (Finegold, 2011) as children with ASD commonly have low blood levels of sulfur and high urinary excretion.</li> <li>- <i>D. pigers</i>, <i>D. desulfuricans</i>, and <i>D. intestinalis</i> found enriched in severe ASD (Finegold et al., 2010), but multiple hypothesis testing correction not performed.</li> <li>- No association found at the genus level after multiple hypothesis testing correction (Kang et al., 2013).</li> <li>- Increased abundance correlated with improvement of GI and improvement of behavioral ASD symptoms after microbial transfer therapy (Kang et al., 2017a).</li> </ul> |
| Family: <i>Bifidobacteriaceae</i><br>ESV21: <i>Bifidobacterium</i>                                                                            | <ul style="list-style-type: none"> <li>- Provides protection from pathogenic infections (Fukuda et al., 2011).</li> <li>- assists in normalization of gut permeability and inhibits inflammatory cytokine IL-10 (Desbonnet et al., 2008)</li> <li>- Aid in prevention of diarrhea, reduce food allergies, and help digest lactose (Di Gioia et al., 2014).</li> <li>- Found depleted in ASD (Adams et al., 2008; Finegold et al., 2010)</li> <li>- Found increased in ASD after microbiota transfer therapy that correlated with improvement of GI and behavioral symptoms (Kang et al., 2017a).</li> </ul>                                                                                                                     |
| Family: <i>Porphyromonadaceae</i><br>ESV12                                                                                                    | <ul style="list-style-type: none"> <li>- Produces butyrate (Vital et al., 2014)</li> <li>- Genus <i>Porphyromonas</i> harbors several species known to be pathogens for oral cavity, namely <i>Gingivalis</i> (Spooner et al., 2016).</li> <li>- <i>Gingivalis</i> produces a unique capsular polysaccharide that triggers Toll-like Receptor 2 dependent anti-inflammatory mechanisms in autoimmune encephalomyelitis mice (model for Multiple Sclerosis) (Nichols et al., 2009; Wang and Kasper, 2014).</li> </ul>                                                                                                                                                                                                            |
| Family: <i>Coriobacteriaceae</i><br>ESV13: <i>Slackia</i>                                                                                     | <ul style="list-style-type: none"> <li>- relatively little physiological information available about the <i>Slackia</i> genus (Krogus-Kurikka et al., 2009).</li> </ul>                                                                                                                                                                                                                                                                                                                                                                                                                                                                                                                                                         |
| Family: <i>Moraxellaceae</i><br>ESV15 <i>Acinetobacter johnsonii</i>                                                                          | <ul style="list-style-type: none"> <li>- Has been characterized in soil and water for its catabolic property in degrading aromatic compounds (Jiang et al., 2018).</li> <li>- Multiple strains of this species have also been reported to develop multi-antibiotics resistance, most likely through horizontal transfer reshuffling (Montaña et al., 2016).</li> <li>- Has capacity to proliferate on butyrate as a sole carbon source (Van Veen et al., 1994).</li> </ul>                                                                                                                                                                                                                                                      |

\*We will not discuss the results related to the ESV2 as it was not possible to assign any taxonomy beyond the order level.
